# Supplementary material for: Associations of lipoprotein particle profile and objectively measured physical activity and sedentary time in schoolchildren: a prospective cohort study
Source: PubMed Central journal article supplement (PMC8781389; doi:10.1186/s12966-022-01244-w), 2022-01-21
Supplement: 12966_2022_1244_MOESM1_ESM.pdf [file 12966_2022_1244_MOESM1_ESM.pdf]

## Supplementary Material

### Supplementary methods

#### *Blood samples*

Serum was drawn from an antecubital vein and obtained according to a standard protocol consisting of the following steps: i) Blood plasma was collected in 5 ml VACUETTE Serum Gel with Activator blood collection tubes (Greiner Bio-One International GmbH, Kremsmünster, Austria). ii) The tubes were carefully inverted five times and placed vertically for coagulation. iii) After 30 minutes, the samples were centrifuged at 2000 G for ten minutes. Serum was then visually inspected for residue and centrifugation was repeated if residue was present. iv) The tubes were kept in a refrigerator at 4°C before pipetting 0.5 ml into cryo tubes. v) The cryo tubes were then stored in a freezer at -20°C for up to 2 days before finally being stored at -80°C until analysis. The frozen serum samples were thawed at room temperature for approximately one hour. Aliquots of 120 µl were carefully mixed with equal amounts of phosphate buffer in Eppendorf tubes, and transferred to 3 mm SampleJet tubes by syringe. A fill height of 4 cm was used amounting to approximately 180 µl.

#### *<sup>1</sup>H NMR protocol*

Serum spectra were recorded at 310 K, using a one-dimensional NOESY (noesygppr1d) pulse sequence. A total of 32 scans were acquired, using 96k data points and 30 ppm spectral width. The spectra were processed with 0.3 Hz line broadening, automatically phase-corrected and aligned to the lactate signal at 1.32 ppm. Spectra were normalised to an ERETIC signal, functioning as an external reference. Details of the <sup>1</sup>H NMR protocol have been described previously.[1]

#### *References*

1. Jones PR, Rajalahti T, Resaland GK, Aadland E, Steene-Johannessen J, Anderssen SA, et al. Associations of physical activity and sedentary time with lipoprotein subclasses in Norwegian schoolchildren: The Active Smarter Kids (ASK) study. *Atherosclerosis*. 2019 Sep 1;288:186–93.

Table 1. Mean and standard deviation (SD) for each lipoprotein measure in absolute concentration units

| Lipoprotein variable               | Baseline           |
|------------------------------------|--------------------|
|                                    | Mean (SD)          |
| CM PN (nmol·L <sup>-1</sup> )      | 0.240 (0.392)      |
| VLDL L1 PN (nmol·L <sup>-1</sup> ) | 1.024 (1.252)      |
| VLDL L2 PN (nmol·L <sup>-1</sup> ) | 4.315 (4.585)      |
| VLDL L3 PN (nmol·L <sup>-1</sup> ) | 19.189 (10.628)    |
| VLDL M PN (nmol·L <sup>-1</sup> )  | 29.151 (13.484)    |
| VLDL S PN (nmol·L <sup>-1</sup> )  | 45.085 (11.105)    |
| LDL L PN (nmol·L <sup>-1</sup> )   | 213.391 (44.846)   |
| LDL M PN (nmol·L <sup>-1</sup> )   | 469.633 (101.065)  |
| LDL S PN (nmol·L <sup>-1</sup> )   | 222.782 (49.953)   |
| LDL VS PN (nmol·L <sup>-1</sup> )  | 0.176 (0.036)      |
| HDL VL PN (nmol·L <sup>-1</sup> )  | 0.087 (0.035)      |
| HDL L PN (nmol·L <sup>-1</sup> )   | 1639.967 (736.695) |
| HDL M PN (nmol·L <sup>-1</sup> )   | 4327.068 (606.213) |
| HDL S PN (nmol·L <sup>-1</sup> )   | 5233.284 (543.149) |
| HDL VS PN (nmol·L <sup>-1</sup> )  | 2674.001 (249.148) |
| CM C (mmol·L <sup>-1</sup> )       | 0.011 (0.014)      |
| VLDL C (mmol·L <sup>-1</sup> )     | 0.642 (0.256)      |
| VLDL L1 C (mmol·L <sup>-1</sup> )  | 0.020 (0.018)      |
| VLDL L2 C (mmol·L <sup>-1</sup> )  | 0.041 (0.042)      |
| VLDL L3 C (mmol·L <sup>-1</sup> )  | 0.205 (0.088)      |
| VLDL M C (mmol·L <sup>-1</sup> )   | 0.164 (0.079)      |
| VLDL S C (mmol·L <sup>-1</sup> )   | 0.208 (0.053)      |
| LDL C (mmol·L <sup>-1</sup> )      | 2.234 (0.496)      |
| LDL L C (mmol·L <sup>-1</sup> )    | 0.716 (0.165)      |
| LDL M C (mmol·L <sup>-1</sup> )    | 0.968 (0.223)      |
| LDL S C (mmol·L <sup>-1</sup> )    | 0.389 (0.093)      |
| LDL VS C (mmol·L <sup>-1</sup> )   | 0.165 (0.035)      |
| HDL C (mmol·L <sup>-1</sup> )      | 1.465 (0.262)      |
| HDL VL C (mmol·L <sup>-1</sup> )   | 0.080 (0.033)      |
| HDL L C (mmol·L <sup>-1</sup> )    | 0.332 (0.156)      |
| HDL M C (mmol·L <sup>-1</sup> )    | 0.528 (0.085)      |
| HDL S C (mmol·L <sup>-1</sup> )    | 0.377 (0.037)      |
| HDL VS C (mmol·L <sup>-1</sup> )   | 0.148 (0.012)      |
| Total C (mmol·L <sup>-1</sup> )    | 4.359 (0.673)      |
| Non-HDL C (mmol·L <sup>-1</sup> )  | 2.894 (0.663)      |
| CM TG (mmol·L <sup>-1</sup> )      | 0.026 (0.044)      |
| VLDL TG (mmol·L <sup>-1</sup> )    | 0.432 (0.318)      |
| VLDL L1 TG (mmol·L <sup>-1</sup> ) | 0.039 (0.053)      |
| VLDL L2 TG (mmol·L <sup>-1</sup> ) | 0.096 (0.102)      |
| VLDL L3 TG (mmol·L <sup>-1</sup> ) | 0.155 (0.113)      |
| VLDL M TG (mmol·L <sup>-1</sup> )  | 0.096 (0.049)      |
| VLDL S TG (mmol·L <sup>-1</sup> )  | 0.046 (0.014)      |
| LDL TG (mmol·L <sup>-1</sup> )     | 0.192 (0.035)      |
| LDL L TG (mmol·L <sup>-1</sup> )   | 0.076 (0.017)      |
| LDL M TG (mmol·L <sup>-1</sup> )   | 0.076 (0.014)      |
| LDL S TG (mmol·L <sup>-1</sup> )   | 0.029 (0.006)      |
| LDL VS TG (mmol·L <sup>-1</sup> )  | 0.011 (0.003)      |

|                                   |                |
|-----------------------------------|----------------|
| HDL TG (mmol·L <sup>-1</sup> )    | 0.104 (0.038)  |
| HDL VL TG (mmol·L <sup>-1</sup> ) | 0.006 (0.003)  |
| HDL L TG (mmol·L <sup>-1</sup> )  | 0.026 (0.010)  |
| HDL M TG (mmol·L <sup>-1</sup> )  | 0.038 (0.016)  |
| HDL S TG (mmol·L <sup>-1</sup> )  | 0.022 (0.010)  |
| HDL VS TG (mmol·L <sup>-1</sup> ) | 0.011 (0.003)  |
| Total TG (mmol·L <sup>-1</sup> )  | 0.748 (0.412)  |
| VLDL size (nm)                    | 42.560 (3.116) |
| LDL size (nm)                     | 25.766 (0.135) |
| HDL size (nm)                     | 10.873 (0.212) |

Abbreviations: CM = chylomicron; HDL = high-density lipoprotein; LDL = low-density lipoprotein; VLDL = very low-density lipoprotein; -C = cholesterol; -L = large; -M = medium; -PN = particle number; -S = small; -TG = triglycerides; -VL = very large; -VS = very small.

Table 2. Comparison of characteristics between those children included or not included in the analytical sample

| Characteristic                  | Included     |              | Excluded                   |              | Difference                  |
|---------------------------------|--------------|--------------|----------------------------|--------------|-----------------------------|
|                                 | <i>n</i> (%) | Mean (SD)    | <i>n</i> (% <sup>a</sup> ) | Mean (SD)    | <i>p</i> value <sup>b</sup> |
| Baseline                        | 762          |              | 367                        |              |                             |
| Age (years)                     |              | 10.0 (0.3)   | 315                        | 10.0 (0.4)   | 0.032                       |
| Sex                             |              |              |                            |              |                             |
| Girls                           | 378 (49.6)   |              | 163 (44.4)                 |              | 0.102                       |
| Boys                            | 384 (50.4)   |              | 204 (55.6)                 |              |                             |
| Anthropometry                   |              |              |                            |              |                             |
| Height (m)                      |              | 143.1 (6.7)  | 334                        | 141.8 (6.9)  | 0.004                       |
| Weight (kg)                     |              | 37.2 (8.1)   | 333                        | 36.6 (7.9)   | 0.201                       |
| BMI (kg·m <sup>-2</sup> )       |              | 18.1 (3.0)   | 333                        | 18.0 (2.9)   | 0.931                       |
| ≥25                             | 189 (24.8)   |              | 70 (21.0)                  |              | 0.913                       |
| ≥30                             | 40 (5.2)     |              | 12 (3.6)                   |              |                             |
| Waist circumference (cm)        |              | 62.1 (7.6)   | 332                        | 61.8 (7.3)   | 0.523                       |
| Parents' education <sup>c</sup> |              |              |                            |              |                             |
| Upper secondary school          | 241 (31.6)   |              | 108 (35.2)                 |              | 0.263                       |
| <4 years college/university     | 229 (30.1)   |              | 91 (29.6)                  |              |                             |
| ≥4 years college/university     | 292 (38.3)   |              | 108 (35.2)                 |              |                             |
| Tanner stage <sup>d</sup>       |              |              |                            |              |                             |
| Stage 1                         | 417 (54.7)   |              | 164 (51.4)                 |              | 0.319                       |
| Stage 2                         | 297 (39.0)   |              | 130 (40.8)                 |              |                             |
| Stage ≥3                        | 48 (6.3)     |              | 25 (7.8)                   |              |                             |
| Physical activity               |              |              |                            |              |                             |
| VPA (min·d <sup>-1</sup> )      |              | 32.2 (16.2)  | 298                        | 27.4 (14.9)  | <0.001                      |
| MPA (min·d <sup>-1</sup> )      |              | 45.1 (12.8)  | 298                        | 41.8 (14.1)  | <0.001                      |
| LPA (min·d <sup>-1</sup> )      |              | 235.2 (36.7) | 298                        | 226.3 (42.5) | 0.001                       |
| SED (min·d <sup>-1</sup> )      |              | 466.5 (57.5) | 298                        | 467.0 (65.2) | 0.909                       |
| MVPA ≥60 (min·d <sup>-1</sup> ) | 563 (73.9)   |              | 189 (51.5)                 |              | <0.001                      |
| Lipid profile <sup>e</sup>      |              |              |                            |              |                             |

|                                         |            |                |            |                |                    |
|-----------------------------------------|------------|----------------|------------|----------------|--------------------|
| TC (mmol·L <sup>-1</sup> )              |            | 4.5 (0.7)      | 246        | 4.4 (0.7)      | 0.390              |
| LDL-C (mmol·L <sup>-1</sup> )           |            | 2.5 (0.6)      | 246        | 2.5 (0.7)      | 0.945              |
| HDL-C (mmol·L <sup>-1</sup> )           |            | 1.6 (0.3)      | 246        | 1.6 (0.3)      | 0.116              |
| TG (mmol·L <sup>-1</sup> ) <sup>f</sup> |            | 0.7 [0.5, 0.9] | 246        | 0.7 [0.5, 0.9] | 0.931 <sup>g</sup> |
| Follow-up                               | 720        |                | 409        |                |                    |
| Physical activity                       |            |                |            |                |                    |
| VPA (min·d <sup>-1</sup> )              |            | 27.6 (13.4)    | 387        | 24.3 (13.3)    | <0.001             |
| MPA (min·d <sup>-1</sup> )              |            | 40.3 (11.9)    | 387        | 40.1 (13.2)    | 0.831              |
| LPA (min·d <sup>-1</sup> )              |            | 220.8 (34.8)   | 387        | 218.3 (39.0)   | 0.276              |
| SED (min·d <sup>-1</sup> )              |            | 494.3 (52.1)   | 387        | 488.6 (65.5)   | 0.114              |
| MVPA ≥60 (min·d <sup>-1</sup> )         | 451 (62.6) |                | 212 (51.8) |                | <0.001             |
| Lipid profile <sup>e</sup>              |            |                |            |                |                    |
| TC (mmol·L <sup>-1</sup> )              |            | 4.5 (0.6)      | 221        | 4.6 (0.7)      | 0.649              |
| LDL-C (mmol·L <sup>-1</sup> )           |            | 2.6 (0.6)      | 221        | 2.6 (0.6)      | 0.641              |
| HDL-C (mmol·L <sup>-1</sup> )           |            | 1.6 (0.3)      | 221        | 1.6 (0.3)      | 0.540              |
| TG (mmol·L <sup>-1</sup> ) <sup>f</sup> |            | 0.6 [0.5, 0.9] | 221        | 0.7 [0.5, 0.9] | 0.224 <sup>g</sup> |

<sup>a</sup>Proportion of total *n* with data available.

<sup>b</sup>Continuous characteristics compared using linear regression, categorical characteristics using binomial logistic regression.

<sup>c</sup>For comparison, dichotomised to ‘Upper secondary school’ and ‘Higher than upper secondary school’.

<sup>d</sup>For comparison, dichotomised to Tanner stage 1 and Tanner stage ≥2.

<sup>e</sup>Measured using clinical chemistry. LDL-C estimated using the Friedewald formula.

<sup>f</sup>Median [IQR].

<sup>g</sup>Comparison performed using *log*(TG).

Abbreviations: BMI = body mass index; HDL-C = high-density lipoprotein; IQR = interquartile range; LDL-C = low-density lipoprotein cholesterol; LPA = light-intensity physical activity; MPA = moderate-intensity physical activity; SD = standard deviation; SED = sedentary time; VPA = vigorous-intensity physical activity; TC = total cholesterol; TG = triglycerides.

Figure 1. Associations between change in vigorous-intensity physical activity (VPA) and follow-up lipoprotein measures

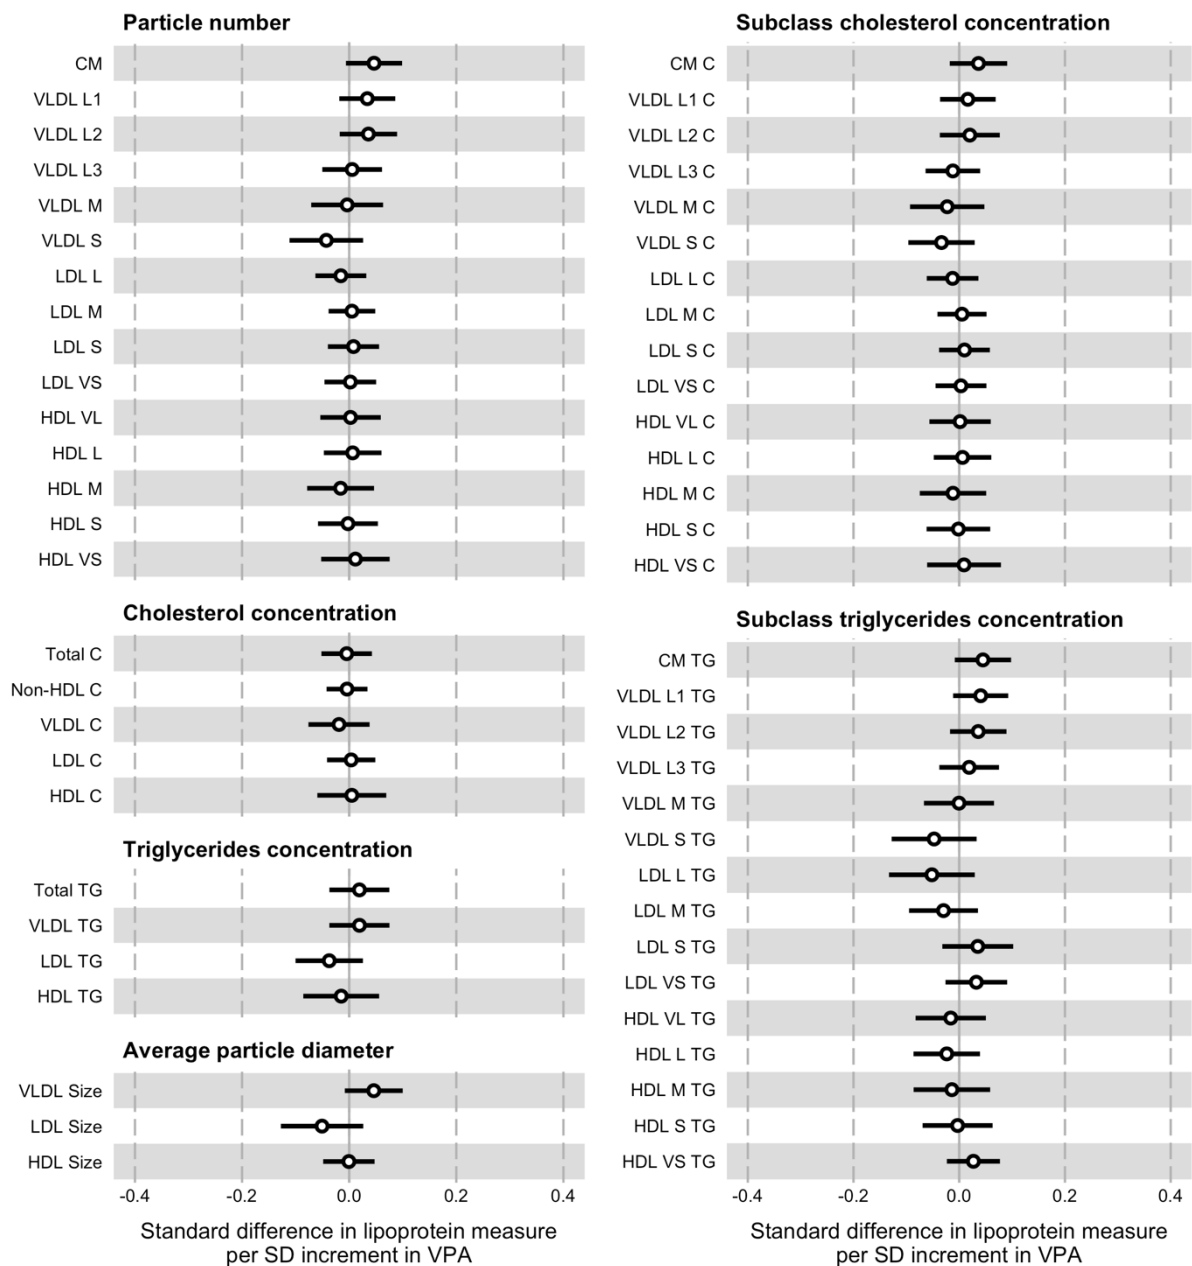

The association magnitudes are the standardised unit difference in lipoprotein measure per SD unit increment of change in activity variable (follow-up minus baseline). The models are adjusted for change in accelerometer wear time and baseline values of age, lipoprotein measure, parents' education, sex, sexual maturity, and waist circumference. Cluster-robust standard errors were calculated, clustered on the school variable. Filled circles are  $p < 0.01$ . Error bars are 95% confidence intervals.

Abbreviations: CM = chylomicron; HDL = high-density lipoprotein; LDL = low-density lipoprotein; SD = standard deviation; VLDL = very low-density lipoprotein; -C = cholesterol; -L = large; -M = medium; -S = small; -TG = triglycerides; -VL = very large; -VS = very small.

Figure 2. Associations between change in moderate-intensity physical activity (MPA) and follow-up lipoprotein measures

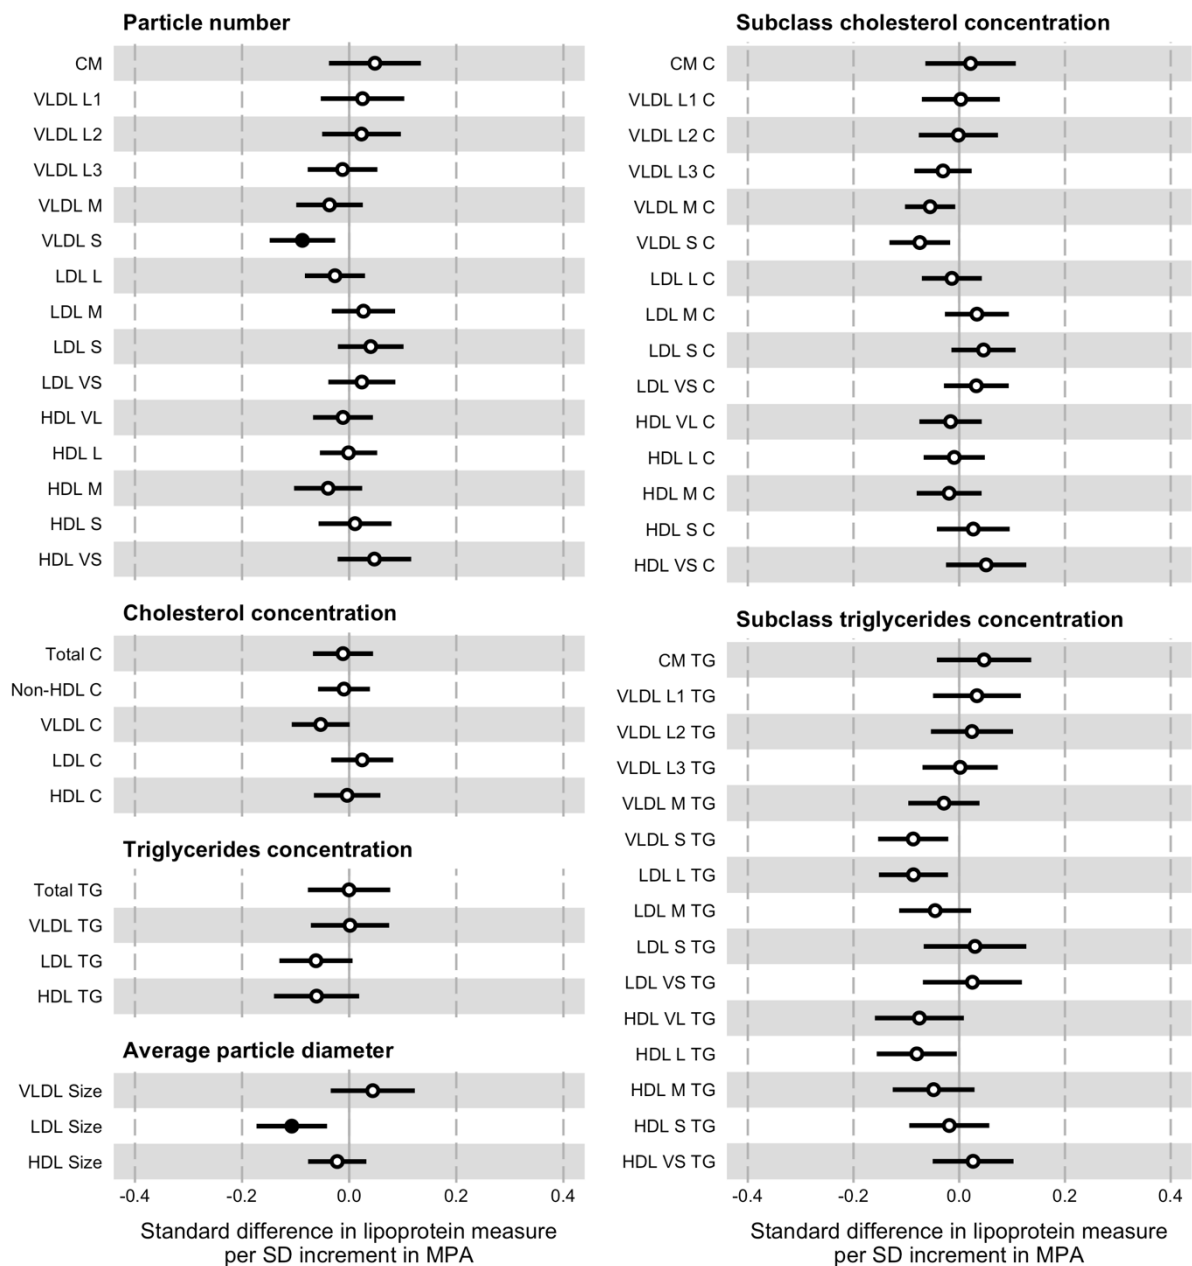

The association magnitudes are the standardised unit difference in lipoprotein measure per SD unit increment of change in activity variable (follow-up minus baseline). The models are adjusted for change in accelerometer wear time and baseline values of age, lipoprotein measure, parents' education, sex, sexual maturity, and waist circumference. Cluster-robust standard errors were calculated, clustered on the school variable. Filled circles are  $p < 0.01$ . Error bars are 95% confidence intervals.

Abbreviations: CM = chylomicron; HDL = high-density lipoprotein; LDL = low-density lipoprotein; SD = standard deviation; VLDL = very low-density lipoprotein; -C = cholesterol; -L = large; -M = medium; -S = small; -TG = triglycerides; -VL = very large; -VS = very small.

Figure 3. Associations between change in light-intensity physical activity (LPA) and follow-up lipoprotein measures

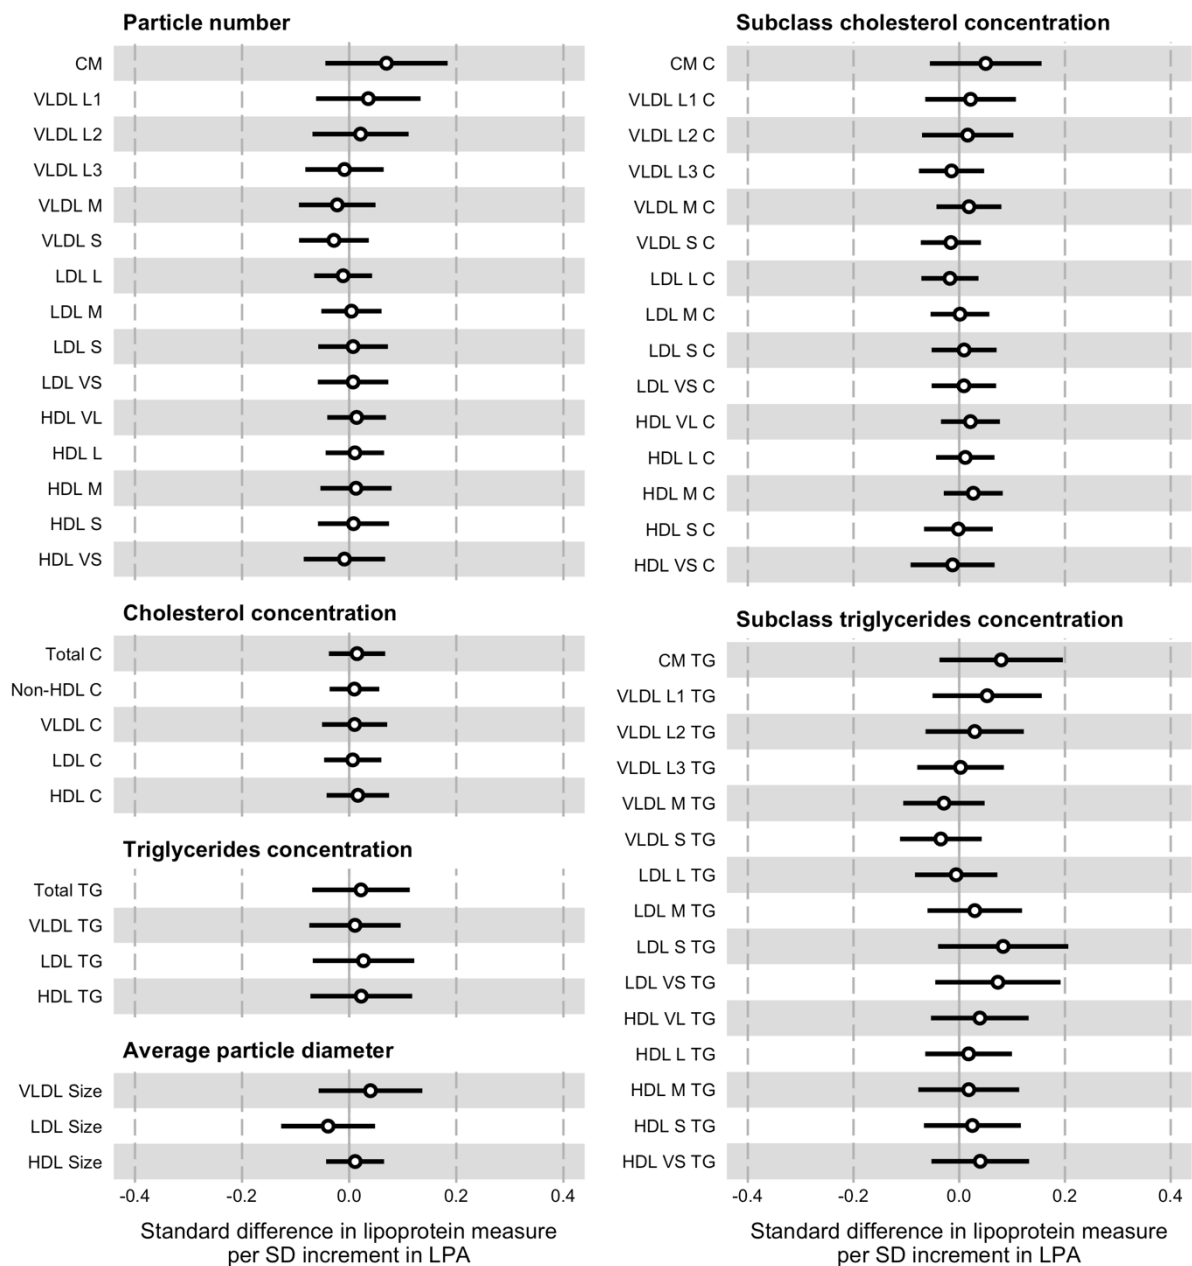

The association magnitudes are the standardised unit difference in lipoprotein measure per SD unit increment of change in activity variable (follow-up minus baseline). The models are adjusted for change in accelerometer wear time and baseline values of age, lipoprotein measure, parents' education, sex, sexual maturity, and waist circumference. Cluster-robust standard errors were calculated, clustered on the school variable. Filled circles are  $p < 0.01$ . Error bars are 95% confidence intervals.

Abbreviations: CM = chylomicron; HDL = high-density lipoprotein; LDL = low-density lipoprotein; SD = standard deviation; VLDL = very low-density lipoprotein; -C = cholesterol; -L = large; -M = medium; -S = small; -TG = triglycerides; -VL = very large; -VS = very small.



Figure 4. Associations between change in sedentary time and follow-up lipoprotein measures

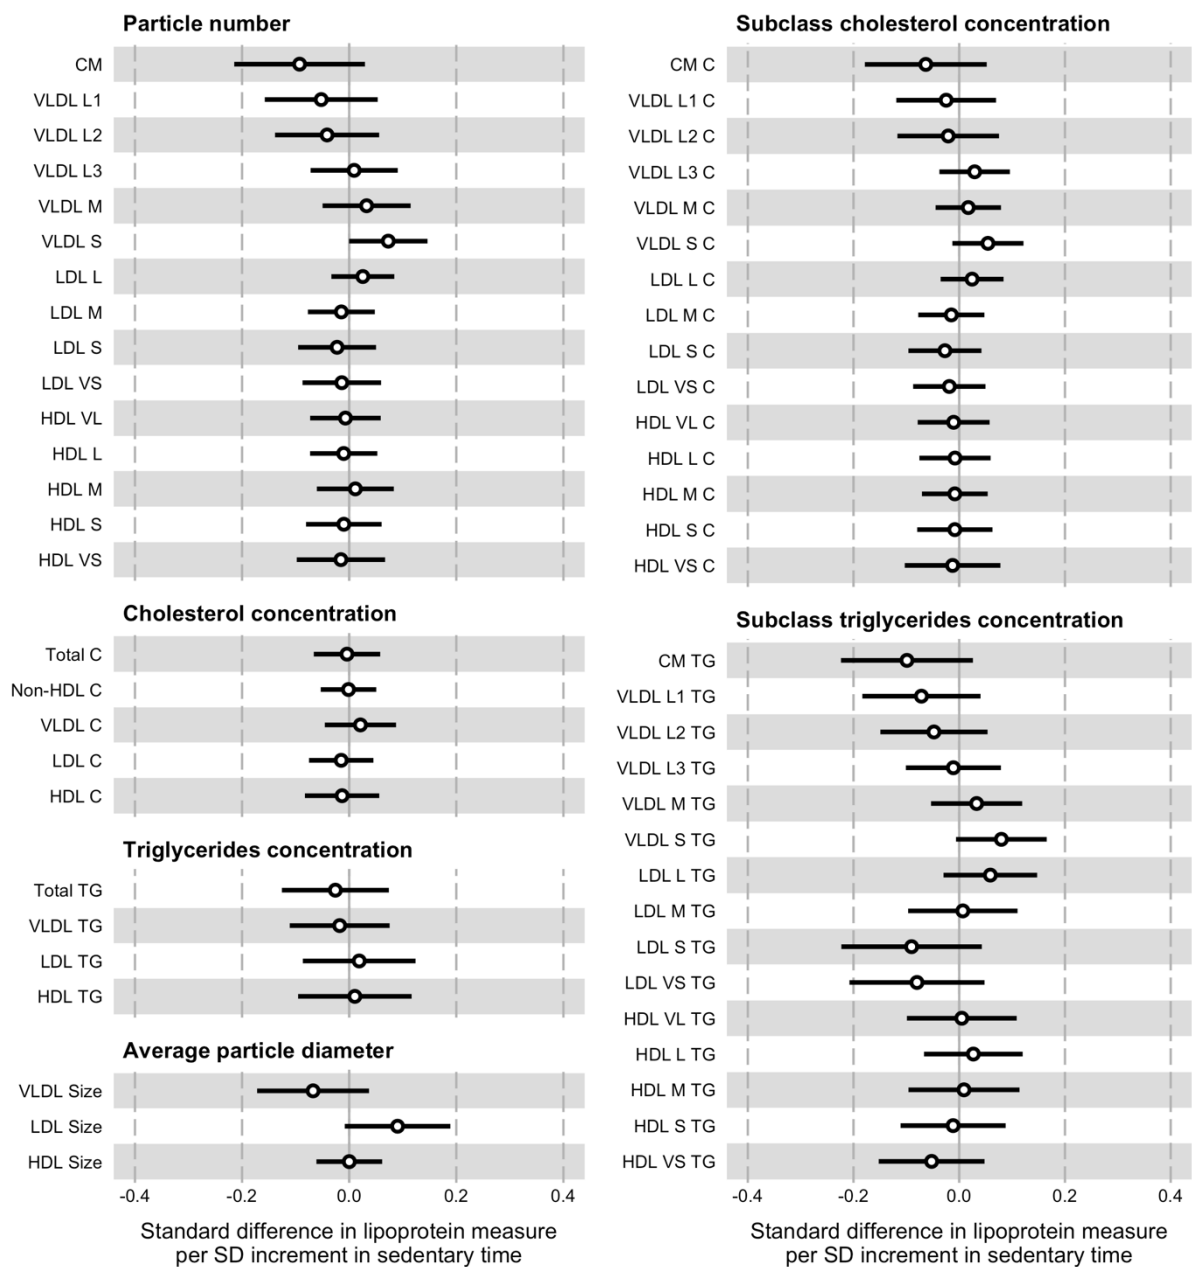

The association magnitudes are the standardised unit difference in lipoprotein measure per SD unit increment of change in activity variable (follow-up minus baseline). The models are adjusted for change in accelerometer wear time and baseline values of age, lipoprotein measure, parents' education, sex, sexual maturity, and waist circumference. Cluster-robust standard errors were calculated, clustered on the school variable. Filled circles are  $p < 0.01$ . Error bars are 95% confidence intervals.

Abbreviations: CM = chylomicron; HDL = high-density lipoprotein; LDL = low-density lipoprotein; SD = standard deviation; VLDL = very low-density lipoprotein; -C = cholesterol; -L = large; -M = medium; -S = small; -TG = triglycerides; -VL = very large; -VS = very small.

Table 3. Associations between baseline vigorous-intensity physical activity (VPA) and follow-up lipoprotein measures

| Lipoprotein measure                | Model 1     |          |          |                | Model 2     |          |          |                |
|------------------------------------|-------------|----------|----------|----------------|-------------|----------|----------|----------------|
|                                    | Coefficient | Lower CI | Upper CI | <i>p</i> value | Coefficient | Lower CI | Upper CI | <i>p</i> value |
| CM PN (nmol·L <sup>-1</sup> )      | -0.0439     | -0.0652  | -0.0227  | 1.17E-04       | -0.0304     | -0.0468  | -0.0140  | 4.71E-04       |
| VLDL L1 PN (nmol·L <sup>-1</sup> ) | -0.1318     | -0.1983  | -0.0653  | 2.06E-04       | -0.0860     | -0.1411  | -0.0309  | 2.79E-03       |
| VLDL L2 PN (nmol·L <sup>-1</sup> ) | -0.4809     | -0.7212  | -0.2406  | 1.82E-04       | -0.3136     | -0.5226  | -0.1047  | 3.95E-03       |
| VLDL L3 PN (nmol·L <sup>-1</sup> ) | -0.9019     | -1.3944  | -0.4095  | 5.44E-04       | -0.5655     | -1.0230  | -0.1080  | 1.63E-02       |
| VLDL M PN (nmol·L <sup>-1</sup> )  | -0.8315     | -1.5453  | -0.1176  | 2.32E-02       | -0.4367     | -1.2215  | 0.3481   | 2.70E-01       |
| VLDL S PN (nmol·L <sup>-1</sup> )  | -0.1670     | -0.7663  | 0.4322   | 5.79E-01       | -0.0384     | -0.6950  | 0.6183   | 9.07E-01       |
| LDL L PN (nmol·L <sup>-1</sup> )   | -1.1285     | -3.0452  | 0.7881   | 2.43E-01       | -0.9264     | -2.9731  | 1.1202   | 3.68E-01       |
| LDL M PN (nmol·L <sup>-1</sup> )   | -4.5116     | -9.7008  | 0.6776   | 8.71E-02       | -3.8345     | -9.1844  | 1.5155   | 1.57E-01       |
| LDL S PN (nmol·L <sup>-1</sup> )   | -2.8130     | -5.8236  | 0.1976   | 6.65E-02       | -2.3074     | -5.2987  | 0.6840   | 1.28E-01       |
| LDL VS PN (nmol·L <sup>-1</sup> )  | -1.3579     | -2.8924  | 0.1767   | 8.17E-02       | -1.1370     | -2.6677  | 0.3937   | 1.42E-01       |
| HDL VL PN (nmol·L <sup>-1</sup> )  | 2.8404      | -2.6701  | 8.3509   | 3.06E-01       | 1.7695      | -3.6925  | 7.2314   | 5.19E-01       |
| HDL L PN (nmol·L <sup>-1</sup> )   | 25.3609     | -14.5915 | 65.3133  | 2.09E-01       | 17.7252     | -22.0069 | 57.4572  | 3.75E-01       |
| HDL M PN (nmol·L <sup>-1</sup> )   | 18.1486     | -17.2347 | 53.5319  | 3.09E-01       | 8.6224      | -25.6787 | 42.9235  | 6.17E-01       |
| HDL S PN (nmol·L <sup>-1</sup> )   | -18.4718    | -50.9702 | 14.0266  | 2.60E-01       | -10.4427    | -42.6659 | 21.7806  | 5.19E-01       |
| HDL VS PN (nmol·L <sup>-1</sup> )  | -11.1428    | -25.5859 | 3.3003   | 1.28E-01       | -7.2357     | -21.2975 | 6.8261   | 3.07E-01       |
| CM C (mmol·L <sup>-1</sup> )       | -0.0015     | -0.0023  | -0.0008  | 8.12E-05       | -0.0010     | -0.0016  | -0.0005  | 7.39E-04       |
| VLDL C (mmol·L <sup>-1</sup> )     | -0.0148     | -0.0243  | -0.0052  | 3.01E-03       | -0.0102     | -0.0202  | -0.0002  | 4.59E-02       |
| VLDL L1 C (mmol·L <sup>-1</sup> )  | -0.0018     | -0.0027  | -0.0009  | 1.23E-04       | -0.0012     | -0.0019  | -0.0005  | 1.79E-03       |
| VLDL L2 C (mmol·L <sup>-1</sup> )  | -0.0041     | -0.0062  | -0.0020  | 2.57E-04       | -0.0026     | -0.0045  | -0.0007  | 8.22E-03       |
| VLDL L3 C (mmol·L <sup>-1</sup> )  | -0.0058     | -0.0094  | -0.0021  | 2.58E-03       | -0.0040     | -0.0074  | -0.0007  | 1.98E-02       |
| VLDL M C (mmol·L <sup>-1</sup> )   | -0.0048     | -0.0086  | -0.0011  | 1.27E-02       | -0.0034     | -0.0074  | 0.0005   | 8.63E-02       |
| VLDL S C (mmol·L <sup>-1</sup> )   | -0.0008     | -0.0033  | 0.0018   | 5.43E-01       | -0.0005     | -0.0033  | 0.0023   | 7.39E-01       |
| LDL C (mmol·L <sup>-1</sup> )      | -0.0220     | -0.0473  | 0.0033   | 8.65E-02       | -0.0189     | -0.0449  | 0.0072   | 1.53E-01       |
| LDL L C (mmol·L <sup>-1</sup> )    | -0.0030     | -0.0101  | 0.0042   | 4.11E-01       | -0.0024     | -0.0100  | 0.0052   | 5.25E-01       |
| LDL M C (mmol·L <sup>-1</sup> )    | -0.0092     | -0.0206  | 0.0023   | 1.16E-01       | -0.0076     | -0.0195  | 0.0042   | 2.01E-01       |
| LDL S C (mmol·L <sup>-1</sup> )    | -0.0054     | -0.0109  | 0.0001   | 5.58E-02       | -0.0044     | -0.0099  | 0.0011   | 1.15E-01       |
| LDL VS C (mmol·L <sup>-1</sup> )   | -0.0020     | -0.0042  | 0.0001   | 6.63E-02       | -0.0017     | -0.0039  | 0.0005   | 1.28E-01       |
| HDL C (mmol·L <sup>-1</sup> )      | 0.0082      | -0.0079  | 0.0242   | 3.12E-01       | 0.0041      | -0.0116  | 0.0198   | 6.02E-01       |
| HDL VL C (mmol·L <sup>-1</sup> )   | 0.0010      | -0.0011  | 0.0030   | 3.53E-01       | 0.0005      | -0.0015  | 0.0025   | 6.22E-01       |
| HDL L C (mmol·L <sup>-1</sup> )    | 0.0053      | -0.0032  | 0.0138   | 2.13E-01       | 0.0035      | -0.0049  | 0.0119   | 4.07E-01       |
| HDL M C (mmol·L <sup>-1</sup> )    | 0.0026      | -0.0023  | 0.0076   | 2.90E-01       | 0.0011      | -0.0038  | 0.0060   | 6.65E-01       |
| HDL S C (mmol·L <sup>-1</sup> )    | -0.0009     | -0.0030  | 0.0013   | 4.34E-01       | -0.0004     | -0.0027  | 0.0018   | 6.94E-01       |

|                                    |         |         |         |          |         |         |         |          |
|------------------------------------|---------|---------|---------|----------|---------|---------|---------|----------|
| HDL VS C (mmol·L <sup>-1</sup> )   | -0.0005 | -0.0012 | 0.0003  | 2.48E-01 | -0.0003 | -0.0011 | 0.0005  | 4.48E-01 |
| Total C (mmol·L <sup>-1</sup> )    | -0.0242 | -0.0567 | 0.0083  | 1.42E-01 | -0.0231 | -0.0566 | 0.0105  | 1.74E-01 |
| Non-HDL C (mmol·L <sup>-1</sup> )  | -0.0313 | -0.0575 | -0.0050 | 2.05E-02 | -0.0271 | -0.0528 | -0.0014 | 3.93E-02 |
| CM TG (mmol·L <sup>-1</sup> )      | -0.0051 | -0.0075 | -0.0027 | 8.23E-05 | -0.0036 | -0.0054 | -0.0018 | 2.30E-04 |
| VLDL TG (mmol·L <sup>-1</sup> )    | -0.0309 | -0.0479 | -0.0139 | 5.93E-04 | -0.0193 | -0.0348 | -0.0037 | 1.60E-02 |
| VLDL L1 TG (mmol·L <sup>-1</sup> ) | -0.0060 | -0.0089 | -0.0032 | 8.48E-05 | -0.0041 | -0.0064 | -0.0018 | 6.38E-04 |
| VLDL L2 TG (mmol·L <sup>-1</sup> ) | -0.0111 | -0.0166 | -0.0056 | 1.51E-04 | -0.0074 | -0.0120 | -0.0027 | 2.42E-03 |
| VLDL L3 TG (mmol·L <sup>-1</sup> ) | -0.0110 | -0.0170 | -0.0050 | 5.56E-04 | -0.0068 | -0.0124 | -0.0013 | 1.66E-02 |
| VLDL M TG (mmol·L <sup>-1</sup> )  | -0.0036 | -0.0064 | -0.0009 | 1.12E-02 | -0.0019 | -0.0049 | 0.0011  | 2.05E-01 |
| VLDL S TG (mmol·L <sup>-1</sup> )  | -0.0004 | -0.0014 | 0.0006  | 4.46E-01 | -0.0001 | -0.0011 | 0.0010  | 9.11E-01 |
| LDL TG (mmol·L <sup>-1</sup> )     | -0.0012 | -0.0031 | 0.0008  | 2.44E-01 | -0.0009 | -0.0028 | 0.0011  | 3.78E-01 |
| LDL L TG (mmol·L <sup>-1</sup> )   | -0.0003 | -0.0016 | 0.0009  | 5.95E-01 | -0.0001 | -0.0014 | 0.0011  | 8.26E-01 |
| LDL M TG (mmol·L <sup>-1</sup> )   | -0.0003 | -0.0012 | 0.0005  | 4.26E-01 | -0.0003 | -0.0011 | 0.0005  | 4.83E-01 |
| LDL S TG (mmol·L <sup>-1</sup> )   | -0.0007 | -0.0010 | -0.0003 | 4.40E-04 | -0.0005 | -0.0008 | -0.0002 | 8.12E-04 |
| LDL VS TG (mmol·L <sup>-1</sup> )  | -0.0004 | -0.0006 | -0.0002 | 4.51E-05 | -0.0003 | -0.0004 | -0.0002 | 4.20E-05 |
| HDL TG (mmol·L <sup>-1</sup> )     | -0.0014 | -0.0037 | 0.0009  | 2.33E-01 | -0.0008 | -0.0032 | 0.0017  | 5.43E-01 |
| HDL VL TG (mmol·L <sup>-1</sup> )  | 0.0000  | -0.0001 | 0.0001  | 8.32E-01 | 0.0000  | -0.0002 | 0.0001  | 5.00E-01 |
| HDL L TG (mmol·L <sup>-1</sup> )   | 0.0004  | -0.0003 | 0.0010  | 2.40E-01 | 0.0002  | -0.0004 | 0.0009  | 5.24E-01 |
| HDL M TG (mmol·L <sup>-1</sup> )   | -0.0007 | -0.0018 | 0.0004  | 1.93E-01 | -0.0003 | -0.0015 | 0.0008  | 5.82E-01 |
| HDL S TG (mmol·L <sup>-1</sup> )   | -0.0007 | -0.0014 | 0.0000  | 4.77E-02 | -0.0004 | -0.0011 | 0.0003  | 3.04E-01 |
| HDL VS TG (mmol·L <sup>-1</sup> )  | -0.0003 | -0.0005 | -0.0002 | 1.14E-04 | -0.0002 | -0.0004 | -0.0001 | 1.24E-03 |
| Total TG (mmol·L <sup>-1</sup> )   | -0.0399 | -0.0613 | -0.0186 | 4.34E-04 | -0.0254 | -0.0447 | -0.0061 | 1.07E-02 |
| VLDL size (nm)                     | -0.3647 | -0.5437 | -0.1856 | 1.44E-04 | -0.2539 | -0.4038 | -0.1041 | 1.27E-03 |
| LDL size (nm)                      | 0.0104  | -0.0007 | 0.0215  | 6.59E-02 | 0.0084  | -0.0028 | 0.0196  | 1.38E-01 |
| HDL size (nm)                      | 0.0077  | -0.0029 | 0.0183  | 1.52E-01 | 0.0051  | -0.0056 | 0.0157  | 3.45E-01 |

Regression coefficients are in absolute concentration units of lipoprotein measures per SD unit increment of activity variable.

Model 1 is adjusted for baseline values of accelerometer wear time, age, lipoprotein measure, parents' education, sex, and sexual maturity. Cluster-robust standard errors were calculated, clustered on the school variable.

Model 2 is adjusted for baseline waist circumference in addition to the Model 1 covariates.

*p* values should be interpreted at a Bonferroni-corrected threshold of 0.01.

In notation of *p* values 1.23E-02 stands for "1.23 times 10 to the power of -02" or 0.0123.

Abbreviations: CI = confidence interval; CM = chylomicron; HDL = high-density lipoprotein; LDL = low-density lipoprotein; SD = standard deviation; VLDL = very low-density lipoprotein; -C = cholesterol; -L = large; -M = medium; -PN = particle number; -S = small; -TG = triglycerides; -VL = very large; -VS = very small.

Table 4. Associations between baseline moderate-intensity physical activity (MPA) and follow-up lipoprotein measures

| Lipoprotein measure                | Model 1     |          |          |                | Model 2     |          |          |                |
|------------------------------------|-------------|----------|----------|----------------|-------------|----------|----------|----------------|
|                                    | Coefficient | Lower CI | Upper CI | <i>p</i> value | Coefficient | Lower CI | Upper CI | <i>p</i> value |
| CM PN (nmol·L <sup>-1</sup> )      | -0.0382     | -0.0642  | -0.0122  | 4.78E-03       | -0.0301     | -0.0548  | -0.0055  | 1.75E-02       |
| VLDL L1 PN (nmol·L <sup>-1</sup> ) | -0.1139     | -0.1973  | -0.0306  | 8.29E-03       | -0.0876     | -0.1657  | -0.0096  | 2.84E-02       |
| VLDL L2 PN (nmol·L <sup>-1</sup> ) | -0.4173     | -0.7279  | -0.1067  | 9.37E-03       | -0.3211     | -0.6129  | -0.0294  | 3.16E-02       |
| VLDL L3 PN (nmol·L <sup>-1</sup> ) | -0.7346     | -1.4111  | -0.0581  | 3.38E-02       | -0.5477     | -1.1816  | 0.0862   | 8.90E-02       |
| VLDL M PN (nmol·L <sup>-1</sup> )  | -0.5595     | -1.3445  | 0.2255   | 1.59E-01       | -0.3334     | -1.0787  | 0.4120   | 3.74E-01       |
| VLDL S PN (nmol·L <sup>-1</sup> )  | 0.1848      | -0.4951  | 0.8647   | 5.88E-01       | 0.2700      | -0.4295  | 0.9695   | 4.43E-01       |
| LDL L PN (nmol·L <sup>-1</sup> )   | 0.3586      | -2.3233  | 3.0405   | 7.90E-01       | 0.5238      | -2.2372  | 3.2847   | 7.05E-01       |
| LDL M PN (nmol·L <sup>-1</sup> )   | -1.9253     | -8.2246  | 4.3741   | 5.43E-01       | -1.4106     | -7.9024  | 5.0812   | 6.65E-01       |
| LDL S PN (nmol·L <sup>-1</sup> )   | -2.0133     | -5.3129  | 1.2863   | 2.27E-01       | -1.6625     | -5.0433  | 1.7183   | 3.29E-01       |
| LDL VS PN (nmol·L <sup>-1</sup> )  | -1.0403     | -2.6494  | 0.5689   | 2.01E-01       | -0.8857     | -2.5288  | 0.7574   | 2.85E-01       |
| HDL VL PN (nmol·L <sup>-1</sup> )  | -1.0764     | -6.0858  | 3.9331   | 6.69E-01       | -1.7402     | -6.8905  | 3.4102   | 5.01E-01       |
| HDL L PN (nmol·L <sup>-1</sup> )   | -6.4509     | -46.3380 | 33.4362  | 7.47E-01       | -10.9988    | -52.0761 | 30.0785  | 5.94E-01       |
| HDL M PN (nmol·L <sup>-1</sup> )   | 9.9821      | -34.2439 | 54.2081  | 6.53E-01       | 4.3478      | -40.5196 | 49.2152  | 8.47E-01       |
| HDL S PN (nmol·L <sup>-1</sup> )   | -1.0307     | -42.7645 | 40.7031  | 9.61E-01       | 4.5043      | -38.3276 | 47.3362  | 8.34E-01       |
| HDL VS PN (nmol·L <sup>-1</sup> )  | -8.3757     | -28.0431 | 11.2917  | 3.97E-01       | -5.7361     | -26.3380 | 14.8658  | 5.79E-01       |
| CM C (mmol·L <sup>-1</sup> )       | -0.0014     | -0.0023  | -0.0005  | 4.35E-03       | -0.0011     | -0.0020  | -0.0002  | 1.50E-02       |
| VLDL C (mmol·L <sup>-1</sup> )     | -0.0078     | -0.0193  | 0.0037   | 1.81E-01       | -0.0052     | -0.0162  | 0.0059   | 3.55E-01       |
| VLDL L1 C (mmol·L <sup>-1</sup> )  | -0.0015     | -0.0026  | -0.0004  | 9.61E-03       | -0.0012     | -0.0022  | -0.0001  | 2.90E-02       |
| VLDL L2 C (mmol·L <sup>-1</sup> )  | -0.0035     | -0.0062  | -0.0008  | 1.26E-02       | -0.0026     | -0.0052  | -0.0001  | 3.98E-02       |
| VLDL L3 C (mmol·L <sup>-1</sup> )  | -0.0047     | -0.0098  | 0.0003   | 6.53E-02       | -0.0037     | -0.0086  | 0.0011   | 1.25E-01       |
| VLDL M C (mmol·L <sup>-1</sup> )   | -0.0023     | -0.0056  | 0.0010   | 1.65E-01       | -0.0015     | -0.0047  | 0.0017   | 3.53E-01       |
| VLDL S C (mmol·L <sup>-1</sup> )   | 0.0008      | -0.0022  | 0.0038   | 5.90E-01       | 0.0010      | -0.0021  | 0.0042   | 5.12E-01       |
| LDL C (mmol·L <sup>-1</sup> )      | -0.0120     | -0.0427  | 0.0187   | 4.38E-01       | -0.0096     | -0.0412  | 0.0220   | 5.46E-01       |
| LDL L C (mmol·L <sup>-1</sup> )    | 0.0007      | -0.0087  | 0.0100   | 8.90E-01       | 0.0011      | -0.0087  | 0.0108   | 8.24E-01       |
| LDL M C (mmol·L <sup>-1</sup> )    | -0.0049     | -0.0191  | 0.0094   | 4.94E-01       | -0.0038     | -0.0185  | 0.0109   | 6.08E-01       |
| LDL S C (mmol·L <sup>-1</sup> )    | -0.0040     | -0.0101  | 0.0022   | 2.00E-01       | -0.0033     | -0.0096  | 0.0030   | 3.00E-01       |
| LDL VS C (mmol·L <sup>-1</sup> )   | -0.0015     | -0.0039  | 0.0008   | 1.87E-01       | -0.0013     | -0.0037  | 0.0011   | 2.76E-01       |
| HDL C (mmol·L <sup>-1</sup> )      | -0.0012     | -0.0177  | 0.0152   | 8.81E-01       | -0.0034     | -0.0199  | 0.0130   | 6.78E-01       |
| HDL VL C (mmol·L <sup>-1</sup> )   | -0.0006     | -0.0025  | 0.0014   | 5.63E-01       | -0.0008     | -0.0028  | 0.0011   | 4.02E-01       |
| HDL L C (mmol·L <sup>-1</sup> )    | -0.0013     | -0.0098  | 0.0071   | 7.56E-01       | -0.0024     | -0.0111  | 0.0063   | 5.86E-01       |
| HDL M C (mmol·L <sup>-1</sup> )    | 0.0005      | -0.0055  | 0.0065   | 8.72E-01       | -0.0004     | -0.0064  | 0.0056   | 8.92E-01       |
| HDL S C (mmol·L <sup>-1</sup> )    | 0.0002      | -0.0027  | 0.0031   | 8.84E-01       | 0.0005      | -0.0025  | 0.0035   | 7.41E-01       |

|                                    |         |         |         |          |         |         |         |          |
|------------------------------------|---------|---------|---------|----------|---------|---------|---------|----------|
| HDL VS C (mmol·L <sup>-1</sup> )   | -0.0003 | -0.0014 | 0.0007  | 5.17E-01 | -0.0002 | -0.0013 | 0.0008  | 6.70E-01 |
| Total C (mmol·L <sup>-1</sup> )    | -0.0158 | -0.0577 | 0.0260  | 4.51E-01 | -0.0147 | -0.0572 | 0.0277  | 4.90E-01 |
| Non-HDL C (mmol·L <sup>-1</sup> )  | -0.0140 | -0.0498 | 0.0217  | 4.35E-01 | -0.0110 | -0.0464 | 0.0245  | 5.38E-01 |
| CM TG (mmol·L <sup>-1</sup> )      | -0.0045 | -0.0074 | -0.0015 | 3.57E-03 | -0.0036 | -0.0064 | -0.0008 | 1.34E-02 |
| VLDL TG (mmol·L <sup>-1</sup> )    | -0.0258 | -0.0477 | -0.0040 | 2.15E-02 | -0.0192 | -0.0397 | 0.0014  | 6.70E-02 |
| VLDL L1 TG (mmol·L <sup>-1</sup> ) | -0.0053 | -0.0089 | -0.0017 | 4.61E-03 | -0.0042 | -0.0075 | -0.0008 | 1.68E-02 |
| VLDL L2 TG (mmol·L <sup>-1</sup> ) | -0.0096 | -0.0167 | -0.0025 | 8.82E-03 | -0.0074 | -0.0141 | -0.0007 | 3.00E-02 |
| VLDL L3 TG (mmol·L <sup>-1</sup> ) | -0.0092 | -0.0171 | -0.0012 | 2.41E-02 | -0.0068 | -0.0142 | 0.0006  | 7.25E-02 |
| VLDL M TG (mmol·L <sup>-1</sup> )  | -0.0027 | -0.0061 | 0.0006  | 1.07E-01 | -0.0017 | -0.0049 | 0.0015  | 2.81E-01 |
| VLDL S TG (mmol·L <sup>-1</sup> )  | -0.0001 | -0.0010 | 0.0007  | 7.50E-01 | 0.0001  | -0.0008 | 0.0009  | 8.94E-01 |
| LDL TG (mmol·L <sup>-1</sup> )     | -0.0005 | -0.0027 | 0.0016  | 6.26E-01 | -0.0003 | -0.0025 | 0.0018  | 7.58E-01 |
| LDL L TG (mmol·L <sup>-1</sup> )   | 0.0000  | -0.0012 | 0.0012  | 9.75E-01 | 0.0001  | -0.0010 | 0.0013  | 8.02E-01 |
| LDL M TG (mmol·L <sup>-1</sup> )   | -0.0001 | -0.0011 | 0.0009  | 8.76E-01 | 0.0000  | -0.0011 | 0.0010  | 9.32E-01 |
| LDL S TG (mmol·L <sup>-1</sup> )   | -0.0007 | -0.0011 | -0.0003 | 1.32E-03 | -0.0006 | -0.0010 | -0.0002 | 3.01E-03 |
| LDL VS TG (mmol·L <sup>-1</sup> )  | -0.0004 | -0.0006 | -0.0001 | 1.56E-03 | -0.0003 | -0.0005 | -0.0001 | 4.76E-03 |
| HDL TG (mmol·L <sup>-1</sup> )     | -0.0013 | -0.0035 | 0.0010  | 2.73E-01 | -0.0009 | -0.0032 | 0.0014  | 4.59E-01 |
| HDL VL TG (mmol·L <sup>-1</sup> )  | -0.0001 | -0.0002 | 0.0001  | 3.22E-01 | -0.0001 | -0.0003 | 0.0001  | 2.29E-01 |
| HDL L TG (mmol·L <sup>-1</sup> )   | 0.0002  | -0.0005 | 0.0008  | 6.25E-01 | 0.0000  | -0.0006 | 0.0007  | 9.04E-01 |
| HDL M TG (mmol·L <sup>-1</sup> )   | -0.0004 | -0.0014 | 0.0005  | 3.67E-01 | -0.0002 | -0.0012 | 0.0008  | 6.82E-01 |
| HDL S TG (mmol·L <sup>-1</sup> )   | -0.0004 | -0.0011 | 0.0002  | 1.74E-01 | -0.0002 | -0.0009 | 0.0004  | 4.39E-01 |
| HDL VS TG (mmol·L <sup>-1</sup> )  | -0.0003 | -0.0005 | -0.0001 | 8.11E-03 | -0.0002 | -0.0004 | 0.0000  | 2.94E-02 |
| Total TG (mmol·L <sup>-1</sup> )   | -0.0337 | -0.0610 | -0.0064 | 1.66E-02 | -0.0253 | -0.0510 | 0.0005  | 5.42E-02 |
| VLDL size (nm)                     | -0.3250 | -0.5441 | -0.1059 | 4.36E-03 | -0.2601 | -0.4685 | -0.0516 | 1.54E-02 |
| LDL size (nm)                      | 0.0121  | 0.0016  | 0.0226  | 2.46E-02 | 0.0109  | -0.0002 | 0.0219  | 5.40E-02 |
| HDL size (nm)                      | -0.0019 | -0.0131 | 0.0093  | 7.35E-01 | -0.0035 | -0.0152 | 0.0082  | 5.50E-01 |

Regression coefficients are in absolute concentration units of lipoprotein measures per SD unit increment of activity variable.

Model 1 is adjusted for baseline values of accelerometer wear time, age, lipoprotein measure, parents' education, sex, and sexual maturity. Cluster-robust standard errors were calculated, clustered on the school variable.

Model 2 is adjusted for baseline waist circumference in addition to the Model 1 covariates.

*p* values should be interpreted at a Bonferroni-corrected threshold of 0.01.

In notation of *p* values 1.23E-02 stands for "1.23 times 10 to the power of -02" or 0.0123.

Abbreviations: CI = confidence interval; CM = chylomicron; HDL = high-density lipoprotein; LDL = low-density lipoprotein; SD = standard deviation; VLDL = very low-density lipoprotein; -C = cholesterol; -L = large; -M = medium; -PN = particle number; -S = small; -TG = triglycerides; -VL = very large; -VS = very small.

Table 5. Associations between baseline light-intensity physical activity (LPA) and follow-up lipoprotein measures

| Lipoprotein measure                | Model 1     |          |          |                | Model 2     |          |          |                |
|------------------------------------|-------------|----------|----------|----------------|-------------|----------|----------|----------------|
|                                    | Coefficient | Lower CI | Upper CI | <i>p</i> value | Coefficient | Lower CI | Upper CI | <i>p</i> value |
| CM PN (nmol·L <sup>-1</sup> )      | -0.0185     | -0.0431  | 0.0062   | 1.40E-01       | -0.0172     | -0.0415  | 0.0070   | 1.60E-01       |
| VLDL L1 PN (nmol·L <sup>-1</sup> ) | -0.0453     | -0.1214  | 0.0309   | 2.39E-01       | -0.0419     | -0.1143  | 0.0305   | 2.51E-01       |
| VLDL L2 PN (nmol·L <sup>-1</sup> ) | -0.1762     | -0.4437  | 0.0914   | 1.93E-01       | -0.1652     | -0.4170  | 0.0866   | 1.94E-01       |
| VLDL L3 PN (nmol·L <sup>-1</sup> ) | -0.0125     | -0.5968  | 0.5717   | 9.66E-01       | 0.0079      | -0.5278  | 0.5436   | 9.76E-01       |
| VLDL M PN (nmol·L <sup>-1</sup> )  | 0.0810      | -0.6827  | 0.8446   | 8.33E-01       | 0.1006      | -0.6010  | 0.8022   | 7.75E-01       |
| VLDL S PN (nmol·L <sup>-1</sup> )  | 0.5186      | -0.3181  | 1.3553   | 2.20E-01       | 0.5320      | -0.3045  | 1.3686   | 2.08E-01       |
| LDL L PN (nmol·L <sup>-1</sup> )   | 2.5262      | 0.0932   | 4.9591   | 4.21E-02       | 2.5597      | 0.1172   | 5.0022   | 4.03E-02       |
| LDL M PN (nmol·L <sup>-1</sup> )   | 5.4295      | 0.1334   | 10.7256  | 4.47E-02       | 5.5798      | 0.3067   | 10.8529  | 3.85E-02       |
| LDL S PN (nmol·L <sup>-1</sup> )   | 2.4162      | -0.5966  | 5.4289   | 1.14E-01       | 2.5299      | -0.4694  | 5.5293   | 9.66E-02       |
| LDL VS PN (nmol·L <sup>-1</sup> )  | 0.7679      | -0.6816  | 2.2175   | 2.93E-01       | 0.8123      | -0.6372  | 2.2618   | 2.66E-01       |
| HDL VL PN (nmol·L <sup>-1</sup> )  | -7.5808     | -12.0786 | -3.0830  | 1.34E-03       | -7.7217     | -12.0542 | -3.3893  | 7.41E-04       |
| HDL L PN (nmol·L <sup>-1</sup> )   | -50.7116    | -83.0841 | -18.3390 | 2.71E-03       | -51.6776    | -82.9954 | -20.3598 | 1.66E-03       |
| HDL M PN (nmol·L <sup>-1</sup> )   | -22.6285    | -58.4923 | 13.2353  | 2.11E-01       | -23.6760    | -58.9766 | 11.6246  | 1.85E-01       |
| HDL S PN (nmol·L <sup>-1</sup> )   | 34.9046     | -3.9806  | 73.7898  | 7.75E-02       | 36.1746     | -2.2388  | 74.5881  | 6.44E-02       |
| HDL VS PN (nmol·L <sup>-1</sup> )  | 16.0605     | -1.1641  | 33.2851  | 6.70E-02       | 16.7175     | -0.4156  | 33.8506  | 5.56E-02       |
| CM C (mmol·L <sup>-1</sup> )       | -0.0007     | -0.0015  | 0.0002   | 1.44E-01       | -0.0006     | -0.0015  | 0.0002   | 1.55E-01       |
| VLDL C (mmol·L <sup>-1</sup> )     | 0.0016      | -0.0118  | 0.0150   | 8.10E-01       | 0.0020      | -0.0109  | 0.0149   | 7.59E-01       |
| VLDL L1 C (mmol·L <sup>-1</sup> )  | -0.0003     | -0.0013  | 0.0007   | 5.59E-01       | -0.0003     | -0.0012  | 0.0007   | 5.85E-01       |
| VLDL L2 C (mmol·L <sup>-1</sup> )  | -0.0010     | -0.0034  | 0.0014   | 4.06E-01       | -0.0009     | -0.0032  | 0.0013   | 4.13E-01       |
| VLDL L3 C (mmol·L <sup>-1</sup> )  | 0.0018      | -0.0023  | 0.0059   | 3.92E-01       | 0.0019      | -0.0020  | 0.0058   | 3.29E-01       |
| VLDL M C (mmol·L <sup>-1</sup> )   | -0.0011     | -0.0049  | 0.0028   | 5.84E-01       | -0.0010     | -0.0047  | 0.0027   | 5.91E-01       |
| VLDL S C (mmol·L <sup>-1</sup> )   | 0.0017      | -0.0021  | 0.0054   | 3.72E-01       | 0.0017      | -0.0021  | 0.0055   | 3.66E-01       |
| LDL C (mmol·L <sup>-1</sup> )      | 0.0212      | -0.0048  | 0.0471   | 1.08E-01       | 0.0218      | -0.0041  | 0.0477   | 9.69E-02       |
| LDL L C (mmol·L <sup>-1</sup> )    | 0.0085      | 0.0002   | 0.0168   | 4.58E-02       | 0.0086      | 0.0002   | 0.0170   | 4.55E-02       |
| LDL M C (mmol·L <sup>-1</sup> )    | 0.0127      | 0.0009   | 0.0246   | 3.52E-02       | 0.0131      | 0.0013   | 0.0248   | 3.05E-02       |
| LDL S C (mmol·L <sup>-1</sup> )    | 0.0041      | -0.0015  | 0.0096   | 1.45E-01       | 0.0043      | -0.0012  | 0.0098   | 1.24E-01       |
| LDL VS C (mmol·L <sup>-1</sup> )   | 0.0012      | -0.0009  | 0.0033   | 2.52E-01       | 0.0013      | -0.0008  | 0.0034   | 2.27E-01       |
| HDL C (mmol·L <sup>-1</sup> )      | -0.0152     | -0.0277  | -0.0027  | 1.79E-02       | -0.0155     | -0.0274  | -0.0036  | 1.19E-02       |
| HDL VL C (mmol·L <sup>-1</sup> )   | -0.0027     | -0.0045  | -0.0009  | 3.19E-03       | -0.0028     | -0.0045  | -0.0011  | 1.85E-03       |
| HDL L C (mmol·L <sup>-1</sup> )    | -0.0109     | -0.0185  | -0.0034  | 5.22E-03       | -0.0112     | -0.0184  | -0.0039  | 3.30E-03       |
| HDL M C (mmol·L <sup>-1</sup> )    | -0.0037     | -0.0081  | 0.0008   | 1.04E-01       | -0.0038     | -0.0080  | 0.0004   | 7.61E-02       |
| HDL S C (mmol·L <sup>-1</sup> )    | 0.0024      | -0.0002  | 0.0051   | 7.32E-02       | 0.0025      | -0.0002  | 0.0051   | 6.51E-02       |

|                                    |         |         |         |          |         |         |         |          |
|------------------------------------|---------|---------|---------|----------|---------|---------|---------|----------|
| HDL VS C (mmol·L <sup>-1</sup> )   | 0.0007  | -0.0002 | 0.0016  | 1.06E-01 | 0.0008  | -0.0001 | 0.0017  | 9.79E-02 |
| Total C (mmol·L <sup>-1</sup> )    | 0.0096  | -0.0258 | 0.0449  | 5.90E-01 | 0.0098  | -0.0255 | 0.0452  | 5.79E-01 |
| Non-HDL C (mmol·L <sup>-1</sup> )  | 0.0233  | -0.0097 | 0.0562  | 1.63E-01 | 0.0241  | -0.0085 | 0.0568  | 1.45E-01 |
| CM TG (mmol·L <sup>-1</sup> )      | -0.0020 | -0.0048 | 0.0008  | 1.57E-01 | -0.0019 | -0.0046 | 0.0009  | 1.82E-01 |
| VLDL TG (mmol·L <sup>-1</sup> )    | -0.0052 | -0.0243 | 0.0138  | 5.85E-01 | -0.0045 | -0.0223 | 0.0133  | 6.14E-01 |
| VLDL L1 TG (mmol·L <sup>-1</sup> ) | -0.0022 | -0.0054 | 0.0010  | 1.69E-01 | -0.0021 | -0.0052 | 0.0010  | 1.84E-01 |
| VLDL L2 TG (mmol·L <sup>-1</sup> ) | -0.0034 | -0.0095 | 0.0027  | 2.68E-01 | -0.0031 | -0.0089 | 0.0026  | 2.82E-01 |
| VLDL L3 TG (mmol·L <sup>-1</sup> ) | -0.0014 | -0.0081 | 0.0053  | 6.85E-01 | -0.0011 | -0.0073 | 0.0051  | 7.20E-01 |
| VLDL M TG (mmol·L <sup>-1</sup> )  | 0.0006  | -0.0026 | 0.0037  | 7.23E-01 | 0.0007  | -0.0023 | 0.0036  | 6.56E-01 |
| VLDL S TG (mmol·L <sup>-1</sup> )  | 0.0007  | -0.0004 | 0.0017  | 2.02E-01 | 0.0007  | -0.0003 | 0.0017  | 1.77E-01 |
| LDL TG (mmol·L <sup>-1</sup> )     | 0.0010  | -0.0015 | 0.0035  | 4.36E-01 | 0.0010  | -0.0015 | 0.0035  | 4.26E-01 |
| LDL L TG (mmol·L <sup>-1</sup> )   | 0.0007  | -0.0005 | 0.0019  | 2.65E-01 | 0.0007  | -0.0005 | 0.0020  | 2.53E-01 |
| LDL M TG (mmol·L <sup>-1</sup> )   | 0.0003  | -0.0007 | 0.0014  | 5.48E-01 | 0.0003  | -0.0007 | 0.0014  | 5.42E-01 |
| LDL S TG (mmol·L <sup>-1</sup> )   | -0.0004 | -0.0008 | 0.0000  | 5.07E-02 | -0.0004 | -0.0008 | 0.0000  | 5.89E-02 |
| LDL VS TG (mmol·L <sup>-1</sup> )  | -0.0002 | -0.0004 | 0.0000  | 8.27E-02 | -0.0002 | -0.0004 | 0.0000  | 9.61E-02 |
| HDL TG (mmol·L <sup>-1</sup> )     | -0.0009 | -0.0036 | 0.0018  | 5.09E-01 | -0.0009 | -0.0036 | 0.0019  | 5.30E-01 |
| HDL VL TG (mmol·L <sup>-1</sup> )  | -0.0002 | -0.0004 | 0.0000  | 1.85E-02 | -0.0002 | -0.0004 | 0.0000  | 1.61E-02 |
| HDL L TG (mmol·L <sup>-1</sup> )   | -0.0003 | -0.0010 | 0.0004  | 3.80E-01 | -0.0003 | -0.0010 | 0.0003  | 3.41E-01 |
| HDL M TG (mmol·L <sup>-1</sup> )   | 0.0000  | -0.0012 | 0.0012  | 9.99E-01 | 0.0000  | -0.0011 | 0.0012  | 9.61E-01 |
| HDL S TG (mmol·L <sup>-1</sup> )   | 0.0002  | -0.0005 | 0.0009  | 6.41E-01 | 0.0002  | -0.0005 | 0.0009  | 5.77E-01 |
| HDL VS TG (mmol·L <sup>-1</sup> )  | 0.0000  | -0.0002 | 0.0001  | 6.11E-01 | 0.0000  | -0.0002 | 0.0001  | 6.56E-01 |
| Total TG (mmol·L <sup>-1</sup> )   | -0.0093 | -0.0342 | 0.0156  | 4.57E-01 | -0.0083 | -0.0319 | 0.0152  | 4.81E-01 |
| VLDL size (nm)                     | -0.1168 | -0.2955 | 0.0620  | 1.96E-01 | -0.1087 | -0.2802 | 0.0627  | 2.09E-01 |
| LDL size (nm)                      | 0.0015  | -0.0100 | 0.0130  | 7.94E-01 | 0.0013  | -0.0103 | 0.0129  | 8.25E-01 |
| HDL size (nm)                      | -0.0158 | -0.0261 | -0.0055 | 3.34E-03 | -0.0162 | -0.0261 | -0.0064 | 1.72E-03 |

Regression coefficients are in absolute concentration units of lipoprotein measures per SD unit increment of activity variable.

Model 1 is adjusted for baseline values of accelerometer wear time, age, lipoprotein measure, parents' education, sex, and sexual maturity. Cluster-robust standard errors were calculated, clustered on the school variable.

Model 2 is adjusted for baseline waist circumference in addition to the Model 1 covariates.

*p* values should be interpreted at a Bonferroni-corrected threshold of 0.01.

In notation of *p* values 1.23E-02 stands for "1.23 times 10 to the power of -02" or 0.0123.

Abbreviations: CI = confidence interval; CM = chylomicron; HDL = high-density lipoprotein; LDL = low-density lipoprotein; SD = standard deviation; VLDL = very low-density lipoprotein; -C = cholesterol; -L = large; -M = medium; -PN = particle number; -S = small; -TG = triglycerides; -VL = very large; -VS = very small.

Table 6. Associations between baseline sedentary time and follow-up lipoprotein measures

| Lipoprotein measure                | Model 1     |          |          |                | Model 2     |          |          |                |
|------------------------------------|-------------|----------|----------|----------------|-------------|----------|----------|----------------|
|                                    | Coefficient | Lower CI | Upper CI | <i>p</i> value | Coefficient | Lower CI | Upper CI | <i>p</i> value |
| CM PN (nmol·L <sup>-1</sup> )      | 0.0435      | 0.0141   | 0.0728   | 4.45E-03       | 0.0346      | 0.0074   | 0.0617   | 1.35E-02       |
| VLDL L1 PN (nmol·L <sup>-1</sup> ) | 0.1218      | 0.0304   | 0.2132   | 9.92E-03       | 0.0926      | 0.0097   | 0.1754   | 2.92E-02       |
| VLDL L2 PN (nmol·L <sup>-1</sup> ) | 0.4531      | 0.1276   | 0.7787   | 7.23E-03       | 0.3476      | 0.0522   | 0.6430   | 2.19E-02       |
| VLDL L3 PN (nmol·L <sup>-1</sup> ) | 0.5786      | -0.1062  | 1.2634   | 9.61E-02       | 0.3684      | -0.2470  | 0.9838   | 2.36E-01       |
| VLDL M PN (nmol·L <sup>-1</sup> )  | 0.4283      | -0.4507  | 1.3074   | 3.33E-01       | 0.1824      | -0.6441  | 1.0088   | 6.60E-01       |
| VLDL S PN (nmol·L <sup>-1</sup> )  | -0.3936     | -1.2882  | 0.5011   | 3.82E-01       | -0.4876     | -1.4312  | 0.4560   | 3.05E-01       |
| LDL L PN (nmol·L <sup>-1</sup> )   | -1.6423     | -4.7158  | 1.4313   | 2.89E-01       | -1.8430     | -5.0281  | 1.3421   | 2.51E-01       |
| LDL M PN (nmol·L <sup>-1</sup> )   | -1.9206     | -8.9266  | 5.0854   | 5.85E-01       | -2.5777     | -9.6757  | 4.5202   | 4.70E-01       |
| LDL S PN (nmol·L <sup>-1</sup> )   | -0.2138     | -4.0090  | 3.5815   | 9.11E-01       | -0.6610     | -4.4907  | 3.1687   | 7.31E-01       |
| LDL VS PN (nmol·L <sup>-1</sup> )  | 0.2335      | -1.6192  | 2.0863   | 8.02E-01       | 0.0429      | -1.8255  | 1.9114   | 9.63E-01       |
| HDL VL PN (nmol·L <sup>-1</sup> )  | 5.2069      | 0.0091   | 10.4048  | 4.96E-02       | 6.0354      | 0.8816   | 11.1893  | 2.25E-02       |
| HDL L PN (nmol·L <sup>-1</sup> )   | 32.2079     | -6.2829  | 70.6988  | 9.93E-02       | 37.9489     | -0.1736  | 76.0714  | 5.10E-02       |
| HDL M PN (nmol·L <sup>-1</sup> )   | 8.5382      | -35.2908 | 52.3673  | 6.98E-01       | 15.1323     | -28.6523 | 58.9169  | 4.92E-01       |
| HDL S PN (nmol·L <sup>-1</sup> )   | -19.3194    | -60.5987 | 21.9599  | 3.53E-01       | -25.7449    | -66.8657 | 15.3760  | 2.15E-01       |
| HDL VS PN (nmol·L <sup>-1</sup> )  | -5.6793     | -25.8369 | 14.4783  | 5.75E-01       | -8.8155     | -29.5220 | 11.8910  | 3.97E-01       |
| CM C (mmol·L <sup>-1</sup> )       | 0.0015      | 0.0005   | 0.0026   | 5.03E-03       | 0.0012      | 0.0003   | 0.0022   | 1.44E-02       |
| VLDL C (mmol·L <sup>-1</sup> )     | 0.0068      | -0.0076  | 0.0213   | 3.48E-01       | 0.0038      | -0.0102  | 0.0178   | 5.87E-01       |
| VLDL L1 C (mmol·L <sup>-1</sup> )  | 0.0014      | 0.0002   | 0.0026   | 2.46E-02       | 0.0010      | -0.0001  | 0.0021   | 6.35E-02       |
| VLDL L2 C (mmol·L <sup>-1</sup> )  | 0.0034      | 0.0005   | 0.0063   | 2.12E-02       | 0.0025      | -0.0001  | 0.0051   | 5.91E-02       |
| VLDL L3 C (mmol·L <sup>-1</sup> )  | 0.0022      | -0.0029  | 0.0073   | 3.89E-01       | 0.0011      | -0.0037  | 0.0058   | 6.56E-01       |
| VLDL M C (mmol·L <sup>-1</sup> )   | 0.0034      | -0.0007  | 0.0076   | 1.06E-01       | 0.0026      | -0.0015  | 0.0067   | 2.13E-01       |
| VLDL S C (mmol·L <sup>-1</sup> )   | -0.0012     | -0.0052  | 0.0027   | 5.35E-01       | -0.0015     | -0.0058  | 0.0028   | 4.90E-01       |
| LDL C (mmol·L <sup>-1</sup> )      | -0.0044     | -0.0389  | 0.0300   | 7.98E-01       | -0.0074     | -0.0423  | 0.0275   | 6.72E-01       |
| LDL L C (mmol·L <sup>-1</sup> )    | -0.0057     | -0.0160  | 0.0046   | 2.72E-01       | -0.0062     | -0.0170  | 0.0045   | 2.51E-01       |
| LDL M C (mmol·L <sup>-1</sup> )    | -0.0050     | -0.0206  | 0.0107   | 5.28E-01       | -0.0064     | -0.0223  | 0.0095   | 4.24E-01       |
| LDL S C (mmol·L <sup>-1</sup> )    | 0.0000      | -0.0070  | 0.0071   | 9.89E-01       | -0.0008     | -0.0079  | 0.0063   | 8.22E-01       |
| LDL VS C (mmol·L <sup>-1</sup> )   | 0.0003      | -0.0024  | 0.0030   | 8.30E-01       | 0.0000      | -0.0027  | 0.0027   | 9.99E-01       |
| HDL C (mmol·L <sup>-1</sup> )      | 0.0094      | -0.0066  | 0.0254   | 2.46E-01       | 0.0120      | -0.0034  | 0.0275   | 1.25E-01       |
| HDL VL C (mmol·L <sup>-1</sup> )   | 0.0019      | -0.0001  | 0.0040   | 6.11E-02       | 0.0023      | 0.0003   | 0.0043   | 2.75E-02       |
| HDL L C (mmol·L <sup>-1</sup> )    | 0.0070      | -0.0017  | 0.0156   | 1.11E-01       | 0.0083      | -0.0003  | 0.0169   | 5.71E-02       |
| HDL M C (mmol·L <sup>-1</sup> )    | 0.0018      | -0.0039  | 0.0075   | 5.28E-01       | 0.0029      | -0.0027  | 0.0084   | 3.02E-01       |
| HDL S C (mmol·L <sup>-1</sup> )    | -0.0016     | -0.0046  | 0.0014   | 2.82E-01       | -0.0019     | -0.0049  | 0.0010   | 1.98E-01       |



|                                    |         |         |        |          |         |         |        |          |
|------------------------------------|---------|---------|--------|----------|---------|---------|--------|----------|
| HDL VS C (mmol·L <sup>-1</sup> )   | -0.0003 | -0.0014 | 0.0008 | 5.95E-01 | -0.0004 | -0.0016 | 0.0007 | 4.71E-01 |
| Total C (mmol·L <sup>-1</sup> )    | 0.0068  | -0.0405 | 0.0542 | 7.74E-01 | 0.0054  | -0.0425 | 0.0533 | 8.22E-01 |
| Non-HDL C (mmol·L <sup>-1</sup> )  | -0.0019 | -0.0440 | 0.0402 | 9.28E-01 | -0.0057 | -0.0474 | 0.0359 | 7.84E-01 |
| CM TG (mmol·L <sup>-1</sup> )      | 0.0049  | 0.0016  | 0.0083 | 4.21E-03 | 0.0039  | 0.0009  | 0.0070 | 1.29E-02 |
| VLDL TG (mmol·L <sup>-1</sup> )    | 0.0240  | 0.0015  | 0.0464 | 3.70E-02 | 0.0166  | -0.0038 | 0.0371 | 1.08E-01 |
| VLDL L1 TG (mmol·L <sup>-1</sup> ) | 0.0057  | 0.0018  | 0.0096 | 4.81E-03 | 0.0045  | 0.0009  | 0.0080 | 1.46E-02 |
| VLDL L2 TG (mmol·L <sup>-1</sup> ) | 0.0099  | 0.0025  | 0.0173 | 9.50E-03 | 0.0075  | 0.0008  | 0.0142 | 2.90E-02 |
| VLDL L3 TG (mmol·L <sup>-1</sup> ) | 0.0081  | 0.0002  | 0.0160 | 4.51E-02 | 0.0055  | -0.0017 | 0.0127 | 1.29E-01 |
| VLDL M TG (mmol·L <sup>-1</sup> )  | 0.0018  | -0.0017 | 0.0053 | 3.02E-01 | 0.0007  | -0.0025 | 0.0040 | 6.60E-01 |
| VLDL S TG (mmol·L <sup>-1</sup> )  | -0.0003 | -0.0014 | 0.0008 | 5.55E-01 | -0.0005 | -0.0017 | 0.0006 | 3.34E-01 |
| LDL TG (mmol·L <sup>-1</sup> )     | -0.0001 | -0.0031 | 0.0028 | 9.24E-01 | -0.0004 | -0.0032 | 0.0025 | 8.08E-01 |
| LDL L TG (mmol·L <sup>-1</sup> )   | -0.0004 | -0.0019 | 0.0011 | 5.87E-01 | -0.0005 | -0.0020 | 0.0009 | 4.65E-01 |
| LDL M TG (mmol·L <sup>-1</sup> )   | -0.0001 | -0.0013 | 0.0012 | 8.95E-01 | -0.0001 | -0.0014 | 0.0011 | 8.46E-01 |
| LDL S TG (mmol·L <sup>-1</sup> )   | 0.0008  | 0.0003  | 0.0012 | 1.45E-03 | 0.0007  | 0.0002  | 0.0011 | 2.75E-03 |
| LDL VS TG (mmol·L <sup>-1</sup> )  | 0.0004  | 0.0002  | 0.0007 | 1.69E-03 | 0.0003  | 0.0001  | 0.0006 | 4.14E-03 |
| HDL TG (mmol·L <sup>-1</sup> )     | 0.0017  | -0.0012 | 0.0046 | 2.54E-01 | 0.0013  | -0.0017 | 0.0043 | 4.02E-01 |
| HDL VL TG (mmol·L <sup>-1</sup> )  | 0.0002  | 0.0000  | 0.0004 | 4.71E-02 | 0.0002  | 0.0000  | 0.0004 | 2.76E-02 |
| HDL L TG (mmol·L <sup>-1</sup> )   | 0.0000  | -0.0007 | 0.0008 | 9.25E-01 | 0.0002  | -0.0006 | 0.0009 | 6.65E-01 |
| HDL M TG (mmol·L <sup>-1</sup> )   | 0.0004  | -0.0008 | 0.0017 | 4.96E-01 | 0.0002  | -0.0011 | 0.0014 | 7.86E-01 |
| HDL S TG (mmol·L <sup>-1</sup> )   | 0.0003  | -0.0005 | 0.0011 | 4.68E-01 | 0.0001  | -0.0007 | 0.0008 | 8.59E-01 |
| HDL VS TG (mmol·L <sup>-1</sup> )  | 0.0002  | 0.0000  | 0.0005 | 2.14E-02 | 0.0002  | 0.0000  | 0.0004 | 6.22E-02 |
| Total TG (mmol·L <sup>-1</sup> )   | 0.0332  | 0.0040  | 0.0624 | 2.68E-02 | 0.0240  | -0.0029 | 0.0508 | 7.89E-02 |
| VLDL size (nm)                     | 0.3324  | 0.1090  | 0.5558 | 4.25E-03 | 0.2612  | 0.0569  | 0.4656 | 1.32E-02 |
| LDL size (nm)                      | -0.0087 | -0.0217 | 0.0043 | 1.84E-01 | -0.0073 | -0.0211 | 0.0065 | 2.92E-01 |
| HDL size (nm)                      | 0.0100  | -0.0013 | 0.0214 | 8.24E-02 | 0.0121  | 0.0009  | 0.0233 | 3.53E-02 |

Regression coefficients are in absolute concentration units of lipoprotein measures per SD unit increment of activity variable.

Model 1 is adjusted for baseline values of accelerometer wear time, age, lipoprotein measure, parents' education, sex, and sexual maturity. Cluster-robust standard errors were calculated, clustered on the school variable.

Model 2 is adjusted for baseline waist circumference in addition to the Model 1 covariates.

*p* values should be interpreted at a Bonferroni-corrected threshold of 0.01.

In notation of *p* values 1.23E-02 stands for "1.23 times 10 to the power of -02" or 0.0123.

Abbreviations: CI = confidence interval; CM = chylomicron; HDL = high-density lipoprotein; LDL = low-density lipoprotein; SD = standard deviation; VLDL = very low-density lipoprotein; -C = cholesterol; -L = large; -M = medium; -PN = particle number; -S = small; -TG = triglycerides; -VL = very large; -VS = very small.

Table 7. Associations between change in vigorous-intensity physical activity (VPA) and follow-up lipoprotein measures

| Lipoprotein measure                | Model 1     |          |          |                | Model 2     |          |          |                |
|------------------------------------|-------------|----------|----------|----------------|-------------|----------|----------|----------------|
|                                    | Coefficient | Lower CI | Upper CI | <i>p</i> value | Coefficient | Lower CI | Upper CI | <i>p</i> value |
| CM PN (nmol·L <sup>-1</sup> )      | 0.0108      | -0.0042  | 0.0258   | 1.53E-01       | 0.0140      | -0.0018  | 0.0299   | 8.21E-02       |
| VLDL L1 PN (nmol·L <sup>-1</sup> ) | 0.0235      | -0.0249  | 0.0719   | 3.35E-01       | 0.0345      | -0.0189  | 0.0879   | 2.01E-01       |
| VLDL L2 PN (nmol·L <sup>-1</sup> ) | 0.0966      | -0.0874  | 0.2806   | 2.97E-01       | 0.1375      | -0.0677  | 0.3428   | 1.85E-01       |
| VLDL L3 PN (nmol·L <sup>-1</sup> ) | -0.0185     | -0.5147  | 0.4776   | 9.41E-01       | 0.0546      | -0.4946  | 0.6039   | 8.43E-01       |
| VLDL M PN (nmol·L <sup>-1</sup> )  | -0.1108     | -0.9120  | 0.6903   | 7.83E-01       | -0.0480     | -0.9019  | 0.8058   | 9.11E-01       |
| VLDL S PN (nmol·L <sup>-1</sup> )  | -0.4840     | -1.2367  | 0.2687   | 2.03E-01       | -0.4723     | -1.2328  | 0.2883   | 2.19E-01       |
| LDL L PN (nmol·L <sup>-1</sup> )   | -0.7025     | -2.7500  | 1.3449   | 4.95E-01       | -0.6772     | -2.7441  | 1.3896   | 5.14E-01       |
| LDL M PN (nmol·L <sup>-1</sup> )   | 0.4207      | -3.8552  | 4.6965   | 8.44E-01       | 0.5066      | -3.8003  | 4.8135   | 8.15E-01       |
| LDL S PN (nmol·L <sup>-1</sup> )   | 0.3272      | -2.0146  | 2.6690   | 7.81E-01       | 0.3961      | -1.9682  | 2.7604   | 7.38E-01       |
| LDL VS PN (nmol·L <sup>-1</sup> )  | 0.0164      | -1.1083  | 1.1411   | 9.77E-01       | 0.0496      | -1.0897  | 1.1888   | 9.31E-01       |
| HDL VL PN (nmol·L <sup>-1</sup> )  | 0.4299      | -4.8948  | 5.7546   | 8.72E-01       | 0.2333      | -5.0853  | 5.5518   | 9.30E-01       |
| HDL L PN (nmol·L <sup>-1</sup> )   | 6.6720      | -33.3875 | 46.7316  | 7.40E-01       | 4.8238      | -35.1531 | 44.8007  | 8.10E-01       |
| HDL M PN (nmol·L <sup>-1</sup> )   | -6.9981     | -43.5765 | 29.5802  | 7.03E-01       | -9.3789     | -45.9249 | 27.1672  | 6.09E-01       |
| HDL S PN (nmol·L <sup>-1</sup> )   | -2.5932     | -33.9902 | 28.8037  | 8.69E-01       | -1.3061     | -33.1582 | 30.5460  | 9.35E-01       |
| HDL VS PN (nmol·L <sup>-1</sup> )  | 2.0747      | -13.7713 | 17.9207  | 7.94E-01       | 2.9408      | -13.2640 | 19.1457  | 7.18E-01       |
| CM C (mmol·L <sup>-1</sup> )       | 0.0003      | -0.0003  | 0.0009   | 2.95E-01       | 0.0004      | -0.0002  | 0.0010   | 1.85E-01       |
| VLDL C (mmol·L <sup>-1</sup> )     | -0.0051     | -0.0181  | 0.0079   | 4.36E-01       | -0.0045     | -0.0182  | 0.0091   | 5.07E-01       |
| VLDL L1 C (mmol·L <sup>-1</sup> )  | 0.0001      | -0.0006  | 0.0008   | 7.62E-01       | 0.0003      | -0.0006  | 0.0011   | 5.37E-01       |
| VLDL L2 C (mmol·L <sup>-1</sup> )  | 0.0004      | -0.0015  | 0.0022   | 6.69E-01       | 0.0007      | -0.0013  | 0.0028   | 4.83E-01       |
| VLDL L3 C (mmol·L <sup>-1</sup> )  | -0.0014     | -0.0054  | 0.0027   | 5.11E-01       | -0.0010     | -0.0055  | 0.0034   | 6.42E-01       |
| VLDL M C (mmol·L <sup>-1</sup> )   | -0.0018     | -0.0068  | 0.0031   | 4.60E-01       | -0.0016     | -0.0067  | 0.0034   | 5.19E-01       |
| VLDL S C (mmol·L <sup>-1</sup> )   | -0.0018     | -0.0051  | 0.0015   | 2.81E-01       | -0.0018     | -0.0051  | 0.0016   | 2.89E-01       |
| LDL C (mmol·L <sup>-1</sup> )      | 0.0014      | -0.0202  | 0.0231   | 8.97E-01       | 0.0018      | -0.0201  | 0.0237   | 8.69E-01       |
| LDL L C (mmol·L <sup>-1</sup> )    | -0.0021     | -0.0098  | 0.0056   | 5.90E-01       | -0.0020     | -0.0097  | 0.0058   | 6.09E-01       |
| LDL M C (mmol·L <sup>-1</sup> )    | 0.0010      | -0.0092  | 0.0111   | 8.51E-01       | 0.0012      | -0.0091  | 0.0114   | 8.21E-01       |
| LDL S C (mmol·L <sup>-1</sup> )    | 0.0008      | -0.0036  | 0.0052   | 7.18E-01       | 0.0009      | -0.0035  | 0.0054   | 6.79E-01       |
| LDL VS C (mmol·L <sup>-1</sup> )   | 0.0001      | -0.0016  | 0.0017   | 9.36E-01       | 0.0001      | -0.0015  | 0.0018   | 8.93E-01       |
| HDL C (mmol·L <sup>-1</sup> )      | 0.0022      | -0.0141  | 0.0184   | 7.89E-01       | 0.0012      | -0.0150  | 0.0174   | 8.80E-01       |
| HDL VL C (mmol·L <sup>-1</sup> )   | 0.0001      | -0.0018  | 0.0021   | 8.90E-01       | 0.0001      | -0.0019  | 0.0020   | 9.56E-01       |
| HDL L C (mmol·L <sup>-1</sup> )    | 0.0014      | -0.0071  | 0.0099   | 7.44E-01       | 0.0010      | -0.0075  | 0.0095   | 8.18E-01       |
| HDL M C (mmol·L <sup>-1</sup> )    | -0.0006     | -0.0056  | 0.0045   | 8.23E-01       | -0.0010     | -0.0061  | 0.0041   | 7.07E-01       |
| HDL S C (mmol·L <sup>-1</sup> )    | -0.0001     | -0.0025  | 0.0022   | 9.14E-01       | -0.0001     | -0.0024  | 0.0023   | 9.58E-01       |

|                                    |         |         |        |          |         |         |        |          |
|------------------------------------|---------|---------|--------|----------|---------|---------|--------|----------|
| HDL VS C (mmol·L <sup>-1</sup> )   | 0.0001  | -0.0008 | 0.0009 | 8.53E-01 | 0.0001  | -0.0007 | 0.0010 | 7.96E-01 |
| Total C (mmol·L <sup>-1</sup> )    | -0.0034 | -0.0337 | 0.0270 | 8.25E-01 | -0.0030 | -0.0337 | 0.0276 | 8.44E-01 |
| Non-HDL C (mmol·L <sup>-1</sup> )  | -0.0031 | -0.0273 | 0.0212 | 8.01E-01 | -0.0026 | -0.0276 | 0.0223 | 8.32E-01 |
| CM TG (mmol·L <sup>-1</sup> )      | 0.0012  | -0.0005 | 0.0029 | 1.78E-01 | 0.0015  | -0.0003 | 0.0033 | 9.78E-02 |
| VLDL TG (mmol·L <sup>-1</sup> )    | 0.0026  | -0.0113 | 0.0166 | 7.08E-01 | 0.0053  | -0.0103 | 0.0209 | 4.98E-01 |
| VLDL L1 TG (mmol·L <sup>-1</sup> ) | 0.0012  | -0.0008 | 0.0032 | 2.22E-01 | 0.0017  | -0.0005 | 0.0039 | 1.25E-01 |
| VLDL L2 TG (mmol·L <sup>-1</sup> ) | 0.0021  | -0.0019 | 0.0062 | 3.01E-01 | 0.0031  | -0.0015 | 0.0076 | 1.83E-01 |
| VLDL L3 TG (mmol·L <sup>-1</sup> ) | 0.0009  | -0.0042 | 0.0060 | 7.19E-01 | 0.0019  | -0.0038 | 0.0076 | 5.08E-01 |
| VLDL M TG (mmol·L <sup>-1</sup> )  | -0.0004 | -0.0032 | 0.0025 | 8.07E-01 | 0.0000  | -0.0031 | 0.0031 | 9.89E-01 |
| VLDL S TG (mmol·L <sup>-1</sup> )  | -0.0007 | -0.0017 | 0.0004 | 2.01E-01 | -0.0006 | -0.0017 | 0.0004 | 2.42E-01 |
| LDL TG (mmol·L <sup>-1</sup> )     | -0.0013 | -0.0033 | 0.0008 | 2.15E-01 | -0.0012 | -0.0033 | 0.0008 | 2.41E-01 |
| LDL L TG (mmol·L <sup>-1</sup> )   | -0.0008 | -0.0021 | 0.0004 | 1.89E-01 | -0.0008 | -0.0021 | 0.0005 | 2.07E-01 |
| LDL M TG (mmol·L <sup>-1</sup> )   | -0.0004 | -0.0012 | 0.0004 | 3.48E-01 | -0.0004 | -0.0012 | 0.0005 | 3.65E-01 |
| LDL S TG (mmol·L <sup>-1</sup> )   | 0.0001  | -0.0002 | 0.0005 | 3.76E-01 | 0.0002  | -0.0002 | 0.0005 | 3.00E-01 |
| LDL VS TG (mmol·L <sup>-1</sup> )  | 0.0001  | -0.0001 | 0.0002 | 3.83E-01 | 0.0001  | -0.0001 | 0.0002 | 2.71E-01 |
| HDL TG (mmol·L <sup>-1</sup> )     | -0.0006 | -0.0029 | 0.0017 | 6.12E-01 | -0.0005 | -0.0028 | 0.0019 | 6.75E-01 |
| HDL VL TG (mmol·L <sup>-1</sup> )  | 0.0000  | -0.0002 | 0.0001 | 6.69E-01 | 0.0000  | -0.0002 | 0.0001 | 6.30E-01 |
| HDL L TG (mmol·L <sup>-1</sup> )   | -0.0002 | -0.0009 | 0.0004 | 5.23E-01 | -0.0002 | -0.0009 | 0.0004 | 4.55E-01 |
| HDL M TG (mmol·L <sup>-1</sup> )   | -0.0002 | -0.0012 | 0.0007 | 6.09E-01 | -0.0002 | -0.0012 | 0.0008 | 7.02E-01 |
| HDL S TG (mmol·L <sup>-1</sup> )   | -0.0001 | -0.0007 | 0.0005 | 7.60E-01 | 0.0000  | -0.0006 | 0.0006 | 9.27E-01 |
| HDL VS TG (mmol·L <sup>-1</sup> )  | 0.0000  | -0.0001 | 0.0002 | 4.81E-01 | 0.0001  | -0.0001 | 0.0002 | 2.90E-01 |
| Total TG (mmol·L <sup>-1</sup> )   | 0.0034  | -0.0141 | 0.0210 | 6.98E-01 | 0.0066  | -0.0129 | 0.0261 | 4.98E-01 |
| VLDL size (nm)                     | 0.0876  | -0.0400 | 0.2152 | 1.74E-01 | 0.1185  | -0.0210 | 0.2580 | 9.45E-02 |
| LDL size (nm)                      | -0.0062 | -0.0166 | 0.0042 | 2.39E-01 | -0.0068 | -0.0172 | 0.0035 | 1.92E-01 |
| HDL size (nm)                      | 0.0005  | -0.0098 | 0.0108 | 9.20E-01 | -0.0001 | -0.0104 | 0.0102 | 9.82E-01 |

Regression coefficients are in absolute concentration units of lipoprotein measures per SD unit increment of change in activity variable (follow-up minus baseline).

Model 1 is adjusted for change in accelerometer wear time, and baseline values of age, lipoprotein measure, parents' education, sex, and sexual maturity. Cluster-robust standard errors were calculated, clustered on the school variable.

Model 2 is adjusted for baseline waist circumference in addition to the Model 1 covariates.

*p* values should be interpreted at a Bonferroni-corrected threshold of 0.01.

In notation of *p* values 1.23E-02 stands for "1.23 times 10 to the power of -02" or 0.0123.

Abbreviations: CI = confidence interval; CM = chylomicron; HDL = high-density lipoprotein; LDL = low-density lipoprotein; SD = standard deviation; VLDL = very low-density lipoprotein; -C = cholesterol; -L = large; -M = medium; -PN = particle number; -S = small; -TG = triglycerides; -VL = very large; -VS = very small.

Table 8. Associations between change in moderate-intensity physical activity (MPA) and follow-up lipoprotein measures

| Lipoprotein measure                | Model 1     |          |          |                | Model 2     |          |          |                |
|------------------------------------|-------------|----------|----------|----------------|-------------|----------|----------|----------------|
|                                    | Coefficient | Lower CI | Upper CI | <i>p</i> value | Coefficient | Lower CI | Upper CI | <i>p</i> value |
| CM PN (nmol·L <sup>-1</sup> )      | 0.0106      | -0.0157  | 0.0369   | 4.22E-01       | 0.0145      | -0.0114  | 0.0405   | 2.67E-01       |
| VLDL L1 PN (nmol·L <sup>-1</sup> ) | 0.0111      | -0.0692  | 0.0914   | 7.82E-01       | 0.0254      | -0.0542  | 0.1051   | 5.25E-01       |
| VLDL L2 PN (nmol·L <sup>-1</sup> ) | 0.0350      | -0.2491  | 0.3192   | 8.06E-01       | 0.0881      | -0.1937  | 0.3699   | 5.34E-01       |
| VLDL L3 PN (nmol·L <sup>-1</sup> ) | -0.2306     | -0.8695  | 0.4083   | 4.73E-01       | -0.1223     | -0.7639  | 0.5193   | 7.04E-01       |
| VLDL M PN (nmol·L <sup>-1</sup> )  | -0.5630     | -1.3596  | 0.2336   | 1.62E-01       | -0.4670     | -1.2577  | 0.3237   | 2.42E-01       |
| VLDL S PN (nmol·L <sup>-1</sup> )  | -0.9850     | -1.6634  | -0.3065  | 5.20E-03       | -0.9667     | -1.6438  | -0.2896  | 5.94E-03       |
| LDL L PN (nmol·L <sup>-1</sup> )   | -1.1913     | -3.6290  | 1.2463   | 3.32E-01       | -1.1550     | -3.5964  | 1.2865   | 3.47E-01       |
| LDL M PN (nmol·L <sup>-1</sup> )   | 2.5004      | -3.3957  | 8.3966   | 3.99E-01       | 2.6286      | -3.2097  | 8.4669   | 3.71E-01       |
| LDL S PN (nmol·L <sup>-1</sup> )   | 1.8869      | -1.1943  | 4.9681   | 2.25E-01       | 1.9861      | -1.0460  | 5.0182   | 1.95E-01       |
| LDL VS PN (nmol·L <sup>-1</sup> )  | 0.5127      | -0.9877  | 2.0130   | 4.96E-01       | 0.5580      | -0.9190  | 2.0351   | 4.52E-01       |
| HDL VL PN (nmol·L <sup>-1</sup> )  | -0.7404     | -6.0243  | 4.5436   | 7.80E-01       | -1.0911     | -6.3625  | 4.1802   | 6.80E-01       |
| HDL L PN (nmol·L <sup>-1</sup> )   | 2.1702      | -37.5730 | 41.9133  | 9.13E-01       | -0.9257     | -40.6145 | 38.7632  | 9.63E-01       |
| HDL M PN (nmol·L <sup>-1</sup> )   | -20.0602    | -57.0219 | 16.9015  | 2.82E-01       | -23.0438    | -60.2602 | 14.1726  | 2.20E-01       |
| HDL S PN (nmol·L <sup>-1</sup> )   | 4.4812      | -34.2539 | 43.2162  | 8.18E-01       | 6.1830      | -32.6127 | 44.9787  | 7.51E-01       |
| HDL VS PN (nmol·L <sup>-1</sup> )  | 10.9407     | -6.8116  | 28.6931  | 2.22E-01       | 11.9216     | -5.5045  | 29.3477  | 1.76E-01       |
| CM C (mmol·L <sup>-1</sup> )       | 0.0001      | -0.0009  | 0.0011   | 8.40E-01       | 0.0002      | -0.0007  | 0.0012   | 6.17E-01       |
| VLDL C (mmol·L <sup>-1</sup> )     | -0.0138     | -0.0265  | -0.0011  | 3.41E-02       | -0.0127     | -0.0256  | 0.0002   | 5.35E-02       |
| VLDL L1 C (mmol·L <sup>-1</sup> )  | -0.0001     | -0.0013  | 0.0010   | 7.95E-01       | 0.0000      | -0.0011  | 0.0012   | 9.34E-01       |
| VLDL L2 C (mmol·L <sup>-1</sup> )  | -0.0005     | -0.0032  | 0.0022   | 7.17E-01       | -0.0001     | -0.0028  | 0.0026   | 9.66E-01       |
| VLDL L3 C (mmol·L <sup>-1</sup> )  | -0.0031     | -0.0078  | 0.0015   | 1.78E-01       | -0.0027     | -0.0073  | 0.0020   | 2.62E-01       |
| VLDL M C (mmol·L <sup>-1</sup> )   | -0.0043     | -0.0077  | -0.0009  | 1.36E-02       | -0.0040     | -0.0074  | -0.0005  | 2.42E-02       |
| VLDL S C (mmol·L <sup>-1</sup> )   | -0.0040     | -0.0071  | -0.0009  | 1.12E-02       | -0.0040     | -0.0070  | -0.0009  | 1.19E-02       |
| LDL C (mmol·L <sup>-1</sup> )      | 0.0112      | -0.0172  | 0.0395   | 4.33E-01       | 0.0118      | -0.0163  | 0.0399   | 4.03E-01       |
| LDL L C (mmol·L <sup>-1</sup> )    | -0.0023     | -0.0113  | 0.0067   | 6.08E-01       | -0.0022     | -0.0112  | 0.0068   | 6.24E-01       |
| LDL M C (mmol·L <sup>-1</sup> )    | 0.0071      | -0.0064  | 0.0205   | 2.96E-01       | 0.0074      | -0.0060  | 0.0207   | 2.73E-01       |
| LDL S C (mmol·L <sup>-1</sup> )    | 0.0041      | -0.0017  | 0.0098   | 1.60E-01       | 0.0042      | -0.0014  | 0.0098   | 1.35E-01       |
| LDL VS C (mmol·L <sup>-1</sup> )   | 0.0010      | -0.0011  | 0.0032   | 3.34E-01       | 0.0011      | -0.0010  | 0.0032   | 2.95E-01       |
| HDL C (mmol·L <sup>-1</sup> )      | 0.0006      | -0.0149  | 0.0160   | 9.40E-01       | -0.0010     | -0.0166  | 0.0147   | 9.03E-01       |
| HDL VL C (mmol·L <sup>-1</sup> )   | -0.0004     | -0.0024  | 0.0016   | 6.87E-01       | -0.0006     | -0.0026  | 0.0014   | 5.81E-01       |
| HDL L C (mmol·L <sup>-1</sup> )    | -0.0007     | -0.0097  | 0.0083   | 8.71E-01       | -0.0015     | -0.0105  | 0.0076   | 7.45E-01       |
| HDL M C (mmol·L <sup>-1</sup> )    | -0.0010     | -0.0059  | 0.0039   | 6.71E-01       | -0.0015     | -0.0065  | 0.0034   | 5.36E-01       |
| HDL S C (mmol·L <sup>-1</sup> )    | 0.0010      | -0.0018  | 0.0037   | 4.81E-01       | 0.0011      | -0.0017  | 0.0038   | 4.43E-01       |

|                                    |         |         |         |          |         |         |         |          |
|------------------------------------|---------|---------|---------|----------|---------|---------|---------|----------|
| HDL VS C (mmol·L <sup>-1</sup> )   | 0.0006  | -0.0004 | 0.0015  | 2.20E-01 | 0.0006  | -0.0003 | 0.0015  | 1.85E-01 |
| Total C (mmol·L <sup>-1</sup> )    | -0.0079 | -0.0445 | 0.0286  | 6.65E-01 | -0.0075 | -0.0440 | 0.0290  | 6.82E-01 |
| Non-HDL C (mmol·L <sup>-1</sup> )  | -0.0072 | -0.0387 | 0.0243  | 6.49E-01 | -0.0063 | -0.0379 | 0.0253  | 6.89E-01 |
| CM TG (mmol·L <sup>-1</sup> )      | 0.0012  | -0.0019 | 0.0042  | 4.51E-01 | 0.0016  | -0.0014 | 0.0046  | 2.96E-01 |
| VLDL TG (mmol·L <sup>-1</sup> )    | -0.0032 | -0.0237 | 0.0173  | 7.54E-01 | 0.0004  | -0.0199 | 0.0207  | 9.66E-01 |
| VLDL L1 TG (mmol·L <sup>-1</sup> ) | 0.0008  | -0.0027 | 0.0044  | 6.45E-01 | 0.0014  | -0.0021 | 0.0049  | 4.23E-01 |
| VLDL L2 TG (mmol·L <sup>-1</sup> ) | 0.0008  | -0.0058 | 0.0075  | 8.00E-01 | 0.0020  | -0.0046 | 0.0087  | 5.37E-01 |
| VLDL L3 TG (mmol·L <sup>-1</sup> ) | -0.0012 | -0.0084 | 0.0061  | 7.47E-01 | 0.0002  | -0.0070 | 0.0074  | 9.62E-01 |
| VLDL M TG (mmol·L <sup>-1</sup> )  | -0.0018 | -0.0051 | 0.0014  | 2.60E-01 | -0.0014 | -0.0045 | 0.0018  | 3.92E-01 |
| VLDL S TG (mmol·L <sup>-1</sup> )  | -0.0012 | -0.0021 | -0.0003 | 8.12E-03 | -0.0012 | -0.0020 | -0.0003 | 1.11E-02 |
| LDL TG (mmol·L <sup>-1</sup> )     | -0.0021 | -0.0043 | 0.0001  | 6.42E-02 | -0.0020 | -0.0042 | 0.0002  | 7.42E-02 |
| LDL L TG (mmol·L <sup>-1</sup> )   | -0.0014 | -0.0025 | -0.0004 | 8.51E-03 | -0.0014 | -0.0024 | -0.0003 | 1.04E-02 |
| LDL M TG (mmol·L <sup>-1</sup> )   | -0.0006 | -0.0015 | 0.0003  | 1.75E-01 | -0.0006 | -0.0015 | 0.0003  | 1.85E-01 |
| LDL S TG (mmol·L <sup>-1</sup> )   | 0.0001  | -0.0004 | 0.0006  | 6.29E-01 | 0.0001  | -0.0003 | 0.0006  | 5.40E-01 |
| LDL VS TG (mmol·L <sup>-1</sup> )  | 0.0000  | -0.0002 | 0.0003  | 7.42E-01 | 0.0001  | -0.0002 | 0.0003  | 5.97E-01 |
| HDL TG (mmol·L <sup>-1</sup> )     | -0.0021 | -0.0048 | 0.0005  | 1.12E-01 | -0.0020 | -0.0047 | 0.0006  | 1.31E-01 |
| HDL VL TG (mmol·L <sup>-1</sup> )  | -0.0002 | -0.0004 | 0.0000  | 8.13E-02 | -0.0002 | -0.0004 | 0.0000  | 7.83E-02 |
| HDL L TG (mmol·L <sup>-1</sup> )   | -0.0008 | -0.0015 | 0.0000  | 4.85E-02 | -0.0008 | -0.0016 | 0.0000  | 3.81E-02 |
| HDL M TG (mmol·L <sup>-1</sup> )   | -0.0007 | -0.0018 | 0.0003  | 1.75E-01 | -0.0007 | -0.0017 | 0.0004  | 2.15E-01 |
| HDL S TG (mmol·L <sup>-1</sup> )   | -0.0003 | -0.0010 | 0.0004  | 4.59E-01 | -0.0002 | -0.0008 | 0.0005  | 6.21E-01 |
| HDL VS TG (mmol·L <sup>-1</sup> )  | 0.0000  | -0.0002 | 0.0002  | 7.61E-01 | 0.0001  | -0.0001 | 0.0003  | 4.95E-01 |
| Total TG (mmol·L <sup>-1</sup> )   | -0.0044 | -0.0315 | 0.0227  | 7.47E-01 | -0.0001 | -0.0269 | 0.0267  | 9.94E-01 |
| VLDL size (nm)                     | 0.0757  | -0.1280 | 0.2793  | 4.60E-01 | 0.1134  | -0.0892 | 0.3161  | 2.67E-01 |
| LDL size (nm)                      | -0.0138 | -0.0228 | -0.0048 | 3.20E-03 | -0.0144 | -0.0233 | -0.0056 | 1.92E-03 |
| HDL size (nm)                      | -0.0038 | -0.0154 | 0.0079  | 5.21E-01 | -0.0048 | -0.0165 | 0.0069  | 4.14E-01 |

Regression coefficients are in absolute concentration units of lipoprotein measures per SD unit increment of change in activity variable (follow-up minus baseline).

Model 1 is adjusted for change in accelerometer wear time, and baseline values of age, lipoprotein measure, parents' education, sex, and sexual maturity. Cluster-robust standard errors were calculated, clustered on the school variable.

Model 2 is adjusted for baseline waist circumference in addition to the Model 1 covariates.

*p* values should be interpreted at a Bonferroni-corrected threshold of 0.01.

In notation of *p* values 1.23E-02 stands for "1.23 times 10 to the power of -02" or 0.0123.

Abbreviations: CI = confidence interval; CM = chylomicron; HDL = high-density lipoprotein; LDL = low-density lipoprotein; SD = standard deviation; VLDL = very low-density lipoprotein; -C = cholesterol; -L = large; -M = medium; -PN = particle number; -S = small; -TG = triglycerides; -VL = very large; -VS = very small.

Table 9. Associations between change in light-intensity physical activity (LPA) and follow-up lipoprotein measures

| Lipoprotein measure                | Model 1     |          |          |                | Model 2     |          |          |                |
|------------------------------------|-------------|----------|----------|----------------|-------------|----------|----------|----------------|
|                                    | Coefficient | Lower CI | Upper CI | <i>p</i> value | Coefficient | Lower CI | Upper CI | <i>p</i> value |
| CM PN (nmol·L <sup>-1</sup> )      | 0.0154      | -0.0195  | 0.0503   | 3.82E-01       | 0.0211      | -0.0135  | 0.0556   | 2.27E-01       |
| VLDL L1 PN (nmol·L <sup>-1</sup> ) | 0.0163      | -0.0842  | 0.1169   | 7.46E-01       | 0.0364      | -0.0631  | 0.1360   | 4.66E-01       |
| VLDL L2 PN (nmol·L <sup>-1</sup> ) | 0.0063      | -0.3423  | 0.3549   | 9.71E-01       | 0.0813      | -0.2627  | 0.4254   | 6.38E-01       |
| VLDL L3 PN (nmol·L <sup>-1</sup> ) | -0.2353     | -0.9772  | 0.5067   | 5.28E-01       | -0.0865     | -0.8080  | 0.6350   | 8.11E-01       |
| VLDL M PN (nmol·L <sup>-1</sup> )  | -0.4388     | -1.4030  | 0.5254   | 3.66E-01       | -0.2843     | -1.1942  | 0.6256   | 5.34E-01       |
| VLDL S PN (nmol·L <sup>-1</sup> )  | -0.3548     | -1.1115  | 0.4019   | 3.52E-01       | -0.3149     | -1.0358  | 0.4060   | 3.85E-01       |
| LDL L PN (nmol·L <sup>-1</sup> )   | -0.5804     | -2.9999  | 1.8390   | 6.33E-01       | -0.4907     | -2.8443  | 1.8628   | 6.78E-01       |
| LDL M PN (nmol·L <sup>-1</sup> )   | 0.0889      | -5.4470  | 5.6248   | 9.74E-01       | 0.4230      | -5.1360  | 5.9820   | 8.79E-01       |
| LDL S PN (nmol·L <sup>-1</sup> )   | 0.1158      | -3.0951  | 3.3267   | 9.43E-01       | 0.3603      | -2.8580  | 3.5785   | 8.23E-01       |
| LDL VS PN (nmol·L <sup>-1</sup> )  | 0.0616      | -1.4823  | 1.6055   | 9.37E-01       | 0.1714      | -1.3817  | 1.7246   | 8.26E-01       |
| HDL VL PN (nmol·L <sup>-1</sup> )  | 1.8640      | -3.4811  | 7.2091   | 4.88E-01       | 1.3078      | -3.8547  | 6.4703   | 6.14E-01       |
| HDL L PN (nmol·L <sup>-1</sup> )   | 12.2894     | -29.2411 | 53.8199  | 5.56E-01       | 7.8932      | -32.6521 | 48.4384  | 6.98E-01       |
| HDL M PN (nmol·L <sup>-1</sup> )   | 12.5207     | -25.9716 | 51.0130  | 5.17E-01       | 7.4208      | -31.4532 | 46.2948  | 7.04E-01       |
| HDL S PN (nmol·L <sup>-1</sup> )   | 1.4009      | -36.7522 | 39.5539  | 9.42E-01       | 4.5969      | -33.2153 | 42.4090  | 8.08E-01       |
| HDL VS PN (nmol·L <sup>-1</sup> )  | -4.2003     | -23.8743 | 15.4736  | 6.71E-01       | -2.2451     | -21.5280 | 17.0378  | 8.16E-01       |
| CM C (mmol·L <sup>-1</sup> )       | 0.0004      | -0.0009  | 0.0016   | 5.61E-01       | 0.0006      | -0.0006  | 0.0018   | 3.46E-01       |
| VLDL C (mmol·L <sup>-1</sup> )     | 0.0007      | -0.0142  | 0.0156   | 9.22E-01       | 0.0024      | -0.0121  | 0.0169   | 7.41E-01       |
| VLDL L1 C (mmol·L <sup>-1</sup> )  | 0.0001      | -0.0013  | 0.0014   | 9.25E-01       | 0.0003      | -0.0010  | 0.0016   | 6.18E-01       |
| VLDL L2 C (mmol·L <sup>-1</sup> )  | -0.0001     | -0.0033  | 0.0031   | 9.70E-01       | 0.0006      | -0.0025  | 0.0037   | 7.12E-01       |
| VLDL L3 C (mmol·L <sup>-1</sup> )  | -0.0020     | -0.0074  | 0.0033   | 4.53E-01       | -0.0013     | -0.0066  | 0.0041   | 6.39E-01       |
| VLDL M C (mmol·L <sup>-1</sup> )   | 0.0008      | -0.0038  | 0.0053   | 7.30E-01       | 0.0013      | -0.0031  | 0.0057   | 5.51E-01       |
| VLDL S C (mmol·L <sup>-1</sup> )   | -0.0009     | -0.0041  | 0.0023   | 5.63E-01       | -0.0008     | -0.0039  | 0.0022   | 5.80E-01       |
| LDL C (mmol·L <sup>-1</sup> )      | 0.0016      | -0.0243  | 0.0276   | 9.00E-01       | 0.0032      | -0.0227  | 0.0291   | 8.05E-01       |
| LDL L C (mmol·L <sup>-1</sup> )    | -0.0030     | -0.0119  | 0.0059   | 4.99E-01       | -0.0028     | -0.0114  | 0.0058   | 5.18E-01       |
| LDL M C (mmol·L <sup>-1</sup> )    | -0.0004     | -0.0127  | 0.0119   | 9.44E-01       | 0.0003      | -0.0119  | 0.0126   | 9.59E-01       |
| LDL S C (mmol·L <sup>-1</sup> )    | 0.0004      | -0.0053  | 0.0061   | 8.93E-01       | 0.0009      | -0.0048  | 0.0065   | 7.64E-01       |
| LDL VS C (mmol·L <sup>-1</sup> )   | 0.0001      | -0.0020  | 0.0022   | 8.95E-01       | 0.0003      | -0.0018  | 0.0024   | 7.72E-01       |
| HDL C (mmol·L <sup>-1</sup> )      | 0.0063      | -0.0086  | 0.0212   | 3.99E-01       | 0.0041      | -0.0106  | 0.0188   | 5.80E-01       |
| HDL VL C (mmol·L <sup>-1</sup> )   | 0.0009      | -0.0010  | 0.0029   | 3.38E-01       | 0.0007      | -0.0012  | 0.0026   | 4.50E-01       |
| HDL L C (mmol·L <sup>-1</sup> )    | 0.0028      | -0.0061  | 0.0117   | 5.29E-01       | 0.0018      | -0.0069  | 0.0104   | 6.80E-01       |
| HDL M C (mmol·L <sup>-1</sup> )    | 0.0030      | -0.0016  | 0.0075   | 1.97E-01       | 0.0022      | -0.0024  | 0.0067   | 3.44E-01       |
| HDL S C (mmol·L <sup>-1</sup> )    | -0.0002     | -0.0028  | 0.0023   | 8.57E-01       | -0.0001     | -0.0026  | 0.0025   | 9.60E-01       |

|                                    |         |         |        |          |         |         |        |          |
|------------------------------------|---------|---------|--------|----------|---------|---------|--------|----------|
| HDL VS C (mmol·L <sup>-1</sup> )   | -0.0002 | -0.0012 | 0.0007 | 6.39E-01 | -0.0002 | -0.0011 | 0.0008 | 7.53E-01 |
| Total C (mmol·L <sup>-1</sup> )    | 0.0084  | -0.0259 | 0.0427 | 6.25E-01 | 0.0095  | -0.0247 | 0.0437 | 5.79E-01 |
| Non-HDL C (mmol·L <sup>-1</sup> )  | 0.0044  | -0.0259 | 0.0348 | 7.70E-01 | 0.0064  | -0.0239 | 0.0366 | 6.75E-01 |
| CM TG (mmol·L <sup>-1</sup> )      | 0.0021  | -0.0020 | 0.0061 | 3.09E-01 | 0.0027  | -0.0013 | 0.0067 | 1.79E-01 |
| VLDL TG (mmol·L <sup>-1</sup> )    | -0.0021 | -0.0264 | 0.0222 | 8.63E-01 | 0.0030  | -0.0207 | 0.0267 | 8.00E-01 |
| VLDL L1 TG (mmol·L <sup>-1</sup> ) | 0.0014  | -0.0030 | 0.0058 | 5.33E-01 | 0.0022  | -0.0021 | 0.0066 | 3.11E-01 |
| VLDL L2 TG (mmol·L <sup>-1</sup> ) | 0.0008  | -0.0072 | 0.0088 | 8.47E-01 | 0.0025  | -0.0054 | 0.0104 | 5.31E-01 |
| VLDL L3 TG (mmol·L <sup>-1</sup> ) | -0.0016 | -0.0101 | 0.0069 | 7.03E-01 | 0.0003  | -0.0080 | 0.0085 | 9.52E-01 |
| VLDL M TG (mmol·L <sup>-1</sup> )  | -0.0021 | -0.0059 | 0.0017 | 2.78E-01 | -0.0014 | -0.0050 | 0.0023 | 4.54E-01 |
| VLDL S TG (mmol·L <sup>-1</sup> )  | -0.0006 | -0.0016 | 0.0005 | 2.84E-01 | -0.0005 | -0.0015 | 0.0006 | 3.71E-01 |
| LDL TG (mmol·L <sup>-1</sup> )     | 0.0008  | -0.0023 | 0.0038 | 6.24E-01 | 0.0009  | -0.0022 | 0.0040 | 5.74E-01 |
| LDL L TG (mmol·L <sup>-1</sup> )   | -0.0002 | -0.0014 | 0.0011 | 7.93E-01 | -0.0001 | -0.0013 | 0.0012 | 8.82E-01 |
| LDL M TG (mmol·L <sup>-1</sup> )   | 0.0004  | -0.0008 | 0.0015 | 5.36E-01 | 0.0004  | -0.0008 | 0.0016 | 5.13E-01 |
| LDL S TG (mmol·L <sup>-1</sup> )   | 0.0004  | -0.0003 | 0.0010 | 2.46E-01 | 0.0004  | -0.0002 | 0.0010 | 1.82E-01 |
| LDL VS TG (mmol·L <sup>-1</sup> )  | 0.0002  | -0.0002 | 0.0005 | 3.32E-01 | 0.0002  | -0.0001 | 0.0005 | 2.22E-01 |
| HDL TG (mmol·L <sup>-1</sup> )     | 0.0005  | -0.0027 | 0.0038 | 7.42E-01 | 0.0008  | -0.0024 | 0.0039 | 6.36E-01 |
| HDL VL TG (mmol·L <sup>-1</sup> )  | 0.0001  | -0.0001 | 0.0003 | 3.41E-01 | 0.0001  | -0.0001 | 0.0003 | 4.03E-01 |
| HDL L TG (mmol·L <sup>-1</sup> )   | 0.0003  | -0.0005 | 0.0011 | 5.12E-01 | 0.0002  | -0.0007 | 0.0010 | 6.67E-01 |
| HDL M TG (mmol·L <sup>-1</sup> )   | 0.0001  | -0.0012 | 0.0015 | 8.65E-01 | 0.0002  | -0.0010 | 0.0015 | 7.07E-01 |
| HDL S TG (mmol·L <sup>-1</sup> )   | 0.0001  | -0.0008 | 0.0010 | 8.26E-01 | 0.0002  | -0.0006 | 0.0010 | 5.89E-01 |
| HDL VS TG (mmol·L <sup>-1</sup> )  | 0.0001  | -0.0002 | 0.0003 | 6.62E-01 | 0.0001  | -0.0001 | 0.0003 | 3.92E-01 |
| Total TG (mmol·L <sup>-1</sup> )   | 0.0016  | -0.0312 | 0.0343 | 9.25E-01 | 0.0077  | -0.0241 | 0.0394 | 6.31E-01 |
| VLDL size (nm)                     | 0.0503  | -0.2013 | 0.3019 | 6.90E-01 | 0.1026  | -0.1473 | 0.3524 | 4.14E-01 |
| LDL size (nm)                      | -0.0041 | -0.0162 | 0.0081 | 5.04E-01 | -0.0053 | -0.0171 | 0.0065 | 3.73E-01 |
| HDL size (nm)                      | 0.0039  | -0.0081 | 0.0158 | 5.21E-01 | 0.0024  | -0.0092 | 0.0140 | 6.83E-01 |

Regression coefficients are in absolute concentration units of lipoprotein measures per SD unit increment of change in activity variable (follow-up minus baseline).

Model 1 is adjusted for change in accelerometer wear time, and baseline values of age, lipoprotein measure, parents' education, sex, and sexual maturity. Cluster-robust standard errors were calculated, clustered on the school variable.

Model 2 is adjusted for baseline waist circumference in addition to the Model 1 covariates.

*p* values should be interpreted at a Bonferroni-corrected threshold of 0.01.

In notation of *p* values 1.23E-02 stands for "1.23 times 10 to the power of -02" or 0.0123.

Abbreviations: CI = confidence interval; CM = chylomicron; HDL = high-density lipoprotein; LDL = low-density lipoprotein; SD = standard deviation; VLDL = very low-density lipoprotein; -C = cholesterol; -L = large; -M = medium; -PN = particle number; -S = small; -TG = triglycerides; -VL = very large; -VS = very small.

Table 10. Associations between change in sedentary time and follow-up lipoprotein measures

| Lipoprotein measure                | Model 1     |          |          |                | Model 2     |          |          |                |
|------------------------------------|-------------|----------|----------|----------------|-------------|----------|----------|----------------|
|                                    | Coefficient | Lower CI | Upper CI | <i>p</i> value | Coefficient | Lower CI | Upper CI | <i>p</i> value |
| CM PN (nmol·L <sup>-1</sup> )      | -0.0208     | -0.0572  | 0.0156   | 2.57E-01       | -0.0280     | -0.0650  | 0.0089   | 1.34E-01       |
| VLDL L1 PN (nmol·L <sup>-1</sup> ) | -0.0278     | -0.1329  | 0.0773   | 5.98E-01       | -0.0533     | -0.1609  | 0.0544   | 3.26E-01       |
| VLDL L2 PN (nmol·L <sup>-1</sup> ) | -0.0632     | -0.4262  | 0.2999   | 7.29E-01       | -0.1581     | -0.5306  | 0.2144   | 3.99E-01       |
| VLDL L3 PN (nmol·L <sup>-1</sup> ) | 0.2758      | -0.5123  | 1.0640   | 4.86E-01       | 0.0910      | -0.7109  | 0.8930   | 8.21E-01       |
| VLDL M PN (nmol·L <sup>-1</sup> )  | 0.5925      | -0.4723  | 1.6572   | 2.70E-01       | 0.4134      | -0.6324  | 1.4593   | 4.32E-01       |
| VLDL S PN (nmol·L <sup>-1</sup> )  | 0.8479      | 0.0131   | 1.6826   | 4.66E-02       | 0.8078      | -0.0024  | 1.6181   | 5.07E-02       |
| LDL L PN (nmol·L <sup>-1</sup> )   | 1.1970      | -1.3815  | 3.7754   | 3.56E-01       | 1.1072      | -1.4480  | 3.6623   | 3.89E-01       |
| LDL M PN (nmol·L <sup>-1</sup> )   | -1.1072     | -7.2414  | 5.0271   | 7.19E-01       | -1.4464     | -7.6239  | 4.7311   | 6.41E-01       |
| LDL S PN (nmol·L <sup>-1</sup> )   | -0.8629     | -4.4405  | 2.7146   | 6.31E-01       | -1.1161     | -4.7132  | 2.4809   | 5.37E-01       |
| LDL VS PN (nmol·L <sup>-1</sup> )  | -0.2108     | -1.9278  | 1.5061   | 8.07E-01       | -0.3254     | -2.0565  | 1.4057   | 7.08E-01       |
| HDL VL PN (nmol·L <sup>-1</sup> )  | -1.2934     | -7.6965  | 5.1097   | 6.87E-01       | -0.6608     | -6.8660  | 5.5444   | 8.32E-01       |
| HDL L PN (nmol·L <sup>-1</sup> )   | -12.8189    | -60.9713 | 35.3335  | 5.96E-01       | -7.5945     | -54.1897 | 39.0006  | 7.45E-01       |
| HDL M PN (nmol·L <sup>-1</sup> )   | 0.6975      | -41.5661 | 42.9611  | 9.74E-01       | 6.7164      | -35.3489 | 48.7818  | 7.50E-01       |
| HDL S PN (nmol·L <sup>-1</sup> )   | -2.0608     | -41.7468 | 37.6252  | 9.18E-01       | -5.6777     | -45.8857 | 34.5303  | 7.78E-01       |
| HDL VS PN (nmol·L <sup>-1</sup> )  | -1.6689     | -22.5853 | 19.2476  | 8.74E-01       | -3.9137     | -24.8108 | 16.9835  | 7.09E-01       |
| CM C (mmol·L <sup>-1</sup> )       | -0.0004     | -0.0017  | 0.0008   | 4.86E-01       | -0.0007     | -0.0020  | 0.0006   | 2.76E-01       |
| VLDL C (mmol·L <sup>-1</sup> )     | 0.0069      | -0.0090  | 0.0228   | 3.87E-01       | 0.0050      | -0.0109  | 0.0209   | 5.30E-01       |
| VLDL L1 C (mmol·L <sup>-1</sup> )  | 0.0000      | -0.0015  | 0.0014   | 9.52E-01       | -0.0004     | -0.0018  | 0.0011   | 6.03E-01       |
| VLDL L2 C (mmol·L <sup>-1</sup> )  | 0.0000      | -0.0034  | 0.0035   | 9.82E-01       | -0.0008     | -0.0042  | 0.0027   | 6.66E-01       |
| VLDL L3 C (mmol·L <sup>-1</sup> )  | 0.0034      | -0.0022  | 0.0090   | 2.24E-01       | 0.0025      | -0.0032  | 0.0083   | 3.85E-01       |
| VLDL M C (mmol·L <sup>-1</sup> )   | 0.0018      | -0.0027  | 0.0064   | 4.18E-01       | 0.0012      | -0.0032  | 0.0057   | 5.82E-01       |
| VLDL S C (mmol·L <sup>-1</sup> )   | 0.0030      | -0.0007  | 0.0067   | 1.14E-01       | 0.0029      | -0.0007  | 0.0065   | 1.12E-01       |
| LDL C (mmol·L <sup>-1</sup> )      | -0.0056     | -0.0346  | 0.0233   | 6.98E-01       | -0.0072     | -0.0364  | 0.0219   | 6.21E-01       |
| LDL L C (mmol·L <sup>-1</sup> )    | 0.0041      | -0.0055  | 0.0137   | 3.96E-01       | 0.0038      | -0.0056  | 0.0133   | 4.17E-01       |
| LDL M C (mmol·L <sup>-1</sup> )    | -0.0025     | -0.0162  | 0.0112   | 7.14E-01       | -0.0033     | -0.0171  | 0.0105   | 6.34E-01       |
| LDL S C (mmol·L <sup>-1</sup> )    | -0.0020     | -0.0084  | 0.0043   | 5.28E-01       | -0.0025     | -0.0089  | 0.0039   | 4.36E-01       |
| LDL VS C (mmol·L <sup>-1</sup> )   | -0.0005     | -0.0028  | 0.0019   | 6.88E-01       | -0.0006     | -0.0030  | 0.0017   | 5.86E-01       |
| HDL C (mmol·L <sup>-1</sup> )      | -0.0060     | -0.0238  | 0.0118   | 5.04E-01       | -0.0033     | -0.0208  | 0.0141   | 7.03E-01       |
| HDL VL C (mmol·L <sup>-1</sup> )   | -0.0006     | -0.0030  | 0.0018   | 6.03E-01       | -0.0004     | -0.0027  | 0.0019   | 7.57E-01       |
| HDL L C (mmol·L <sup>-1</sup> )    | -0.0025     | -0.0133  | 0.0084   | 6.50E-01       | -0.0012     | -0.0118  | 0.0093   | 8.13E-01       |
| HDL M C (mmol·L <sup>-1</sup> )    | -0.0016     | -0.0067  | 0.0035   | 5.24E-01       | -0.0007     | -0.0057  | 0.0044   | 7.89E-01       |
| HDL S C (mmol·L <sup>-1</sup> )    | -0.0001     | -0.0029  | 0.0027   | 9.20E-01       | -0.0003     | -0.0031  | 0.0025   | 8.16E-01       |



|                                    |         |         |        |          |         |         |        |          |
|------------------------------------|---------|---------|--------|----------|---------|---------|--------|----------|
| HDL VS C (mmol·L <sup>-1</sup> )   | -0.0001 | -0.0012 | 0.0010 | 9.08E-01 | -0.0002 | -0.0012 | 0.0009 | 7.82E-01 |
| Total C (mmol·L <sup>-1</sup> )    | -0.0015 | -0.0415 | 0.0385 | 9.39E-01 | -0.0027 | -0.0430 | 0.0376 | 8.95E-01 |
| Non-HDL C (mmol·L <sup>-1</sup> )  | 0.0011  | -0.0322 | 0.0344 | 9.48E-01 | -0.0008 | -0.0347 | 0.0330 | 9.61E-01 |
| CM TG (mmol·L <sup>-1</sup> )      | -0.0026 | -0.0068 | 0.0016 | 2.27E-01 | -0.0034 | -0.0076 | 0.0009 | 1.18E-01 |
| VLDL TG (mmol·L <sup>-1</sup> )    | 0.0015  | -0.0239 | 0.0269 | 9.07E-01 | -0.0049 | -0.0308 | 0.0210 | 7.05E-01 |
| VLDL L1 TG (mmol·L <sup>-1</sup> ) | -0.0019 | -0.0065 | 0.0027 | 4.02E-01 | -0.0030 | -0.0077 | 0.0017 | 2.05E-01 |
| VLDL L2 TG (mmol·L <sup>-1</sup> ) | -0.0019 | -0.0103 | 0.0065 | 6.51E-01 | -0.0041 | -0.0127 | 0.0046 | 3.49E-01 |
| VLDL L3 TG (mmol·L <sup>-1</sup> ) | 0.0012  | -0.0077 | 0.0101 | 7.82E-01 | -0.0011 | -0.0102 | 0.0080 | 8.06E-01 |
| VLDL M TG (mmol·L <sup>-1</sup> )  | 0.0024  | -0.0017 | 0.0065 | 2.42E-01 | 0.0015  | -0.0025 | 0.0056 | 4.48E-01 |
| VLDL S TG (mmol·L <sup>-1</sup> )  | 0.0012  | 0.0000  | 0.0023 | 4.60E-02 | 0.0011  | -0.0001 | 0.0022 | 6.81E-02 |
| LDL TG (mmol·L <sup>-1</sup> )     | 0.0007  | -0.0026 | 0.0041 | 6.63E-01 | 0.0006  | -0.0028 | 0.0040 | 7.23E-01 |
| LDL L TG (mmol·L <sup>-1</sup> )   | 0.0010  | -0.0004 | 0.0024 | 1.56E-01 | 0.0009  | -0.0005 | 0.0024 | 1.89E-01 |
| LDL M TG (mmol·L <sup>-1</sup> )   | 0.0001  | -0.0012 | 0.0014 | 8.60E-01 | 0.0001  | -0.0013 | 0.0014 | 8.95E-01 |
| LDL S TG (mmol·L <sup>-1</sup> )   | -0.0004 | -0.0010 | 0.0003 | 2.44E-01 | -0.0005 | -0.0011 | 0.0002 | 1.80E-01 |
| LDL VS TG (mmol·L <sup>-1</sup> )  | -0.0002 | -0.0005 | 0.0002 | 3.30E-01 | -0.0002 | -0.0006 | 0.0001 | 2.15E-01 |
| HDL TG (mmol·L <sup>-1</sup> )     | 0.0006  | -0.0030 | 0.0042 | 7.39E-01 | 0.0004  | -0.0032 | 0.0039 | 8.42E-01 |
| HDL VL TG (mmol·L <sup>-1</sup> )  | 0.0000  | -0.0002 | 0.0002 | 9.96E-01 | 0.0000  | -0.0002 | 0.0003 | 9.26E-01 |
| HDL L TG (mmol·L <sup>-1</sup> )   | 0.0002  | -0.0008 | 0.0011 | 7.15E-01 | 0.0003  | -0.0007 | 0.0012 | 5.69E-01 |
| HDL M TG (mmol·L <sup>-1</sup> )   | 0.0003  | -0.0012 | 0.0017 | 7.12E-01 | 0.0001  | -0.0013 | 0.0015 | 8.64E-01 |
| HDL S TG (mmol·L <sup>-1</sup> )   | 0.0001  | -0.0009 | 0.0010 | 9.12E-01 | -0.0001 | -0.0010 | 0.0008 | 8.17E-01 |
| HDL VS TG (mmol·L <sup>-1</sup> )  | -0.0001 | -0.0003 | 0.0002 | 5.78E-01 | -0.0001 | -0.0004 | 0.0001 | 3.00E-01 |
| Total TG (mmol·L <sup>-1</sup> )   | -0.0013 | -0.0358 | 0.0331 | 9.39E-01 | -0.0090 | -0.0438 | 0.0258 | 6.07E-01 |
| VLDL size (nm)                     | -0.1062 | -0.3673 | 0.1549 | 4.19E-01 | -0.1738 | -0.4433 | 0.0956 | 2.02E-01 |
| LDL size (nm)                      | 0.0107  | -0.0029 | 0.0243 | 1.20E-01 | 0.0122  | -0.0011 | 0.0254 | 7.17E-02 |
| HDL size (nm)                      | -0.0017 | -0.0154 | 0.0119 | 8.00E-01 | 0.0000  | -0.0131 | 0.0132 | 9.95E-01 |

Regression coefficients are in absolute concentration units of lipoprotein measures per SD unit increment of change in activity variable (follow-up minus baseline).

Model 1 is adjusted for change in accelerometer wear time, and baseline values of age, lipoprotein measure, parents' education, sex, and sexual maturity. Cluster-robust standard errors were calculated, clustered on the school variable.

Model 2 is adjusted for baseline waist circumference in addition to the Model 1 covariates.

*p* values should be interpreted at a Bonferroni-corrected threshold of 0.01.

In notation of *p* values 1.23E-02 stands for "1.23 times 10 to the power of -02" or 0.0123.

Abbreviations: CI = confidence interval; CM = chylomicron; HDL = high-density lipoprotein; LDL = low-density lipoprotein; SD = standard deviation; VLDL = very low-density lipoprotein; -C = cholesterol; -L = large; -M = medium; -PN = particle number; -S = small; -TG = triglycerides; -VL = very large; -VS = very small.
